1 **Signatures of kin selection in a natural population of the bacteria *Bacillus***  
2 ***subtilis***

3

4 Laurence J. Belcher<sup>1\*</sup>, Anna E. Dewar<sup>1</sup>, Chunhui Hao<sup>1</sup>, Melanie Ghoul<sup>1a</sup>, Stuart A. West<sup>1a</sup>

5

6 <sup>1</sup> Department of Biology, University of Oxford, Oxford, OX1 3SZ, United Kingdom

7 <sup>a</sup> Joint last author

8 \*Corresponding author

9

10 **Email:** [laurence.belcher@biology.ox.ac.uk](mailto:laurence.belcher@biology.ox.ac.uk)

11

12

13

14

15

16

17

18

19

20

21

22

23

24

25

26

27

28

29

30

31

32

33

34

35

36

37

38

39

40

41

## 42 **Abstract**

43 Laboratory experiments have suggested that bacteria perform a range of cooperative  
44 behaviours, which are favoured because they are directed towards relatives (kin selection).  
45 However, there is a lack of evidence for cooperation and kin selection in natural bacterial  
46 populations. Molecular population genetics offers a promising method to study natural  
47 populations, because theory predicts that kin selection will lead to relaxed selection, which will  
48 result in increased polymorphism and divergence at cooperative genes. Examining a natural  
49 population of *Bacillus subtilis*, we found consistent evidence that putatively cooperative traits  
50 have higher polymorphism and greater divergence than putatively private traits expressed at  
51 the same rate. In addition, we were able to eliminate alternative explanations for these patterns,  
52 and found more deleterious mutations in genes controlling putatively cooperative traits.  
53 Overall, our results suggest cooperation favoured by kin selection, with an average relatedness  
54 of  $r=0.77$  between interacting individuals.

55  
56

## 57 **Introduction**

58 Laboratory studies have suggested that bacteria cooperate in a diversity of ways (1, 2).  
59 Individual cells produce and secrete molecules to collectively scavenge nutrients, fight  
60 antibiotics, and move through their environment (3–5). This cooperation is however vulnerable  
61 to cheating by non-producers, who withhold their own cooperation whilst benefiting from that  
62 of others (6). A resolution to this vulnerability is kin selection, where cooperation is favoured  
63 because the benefits of cooperation go to related cells which share the gene for cooperation (7).  
64 Laboratory experiments have also supported a role of kin selection, with experimental  
65 evolution, and by showing how clonal growth makes neighbouring cells highly related, and  
66 limited diffusion keeps secreted molecules in the neighbourhood (3, 8–11).

67

68 In contrast, there is little evidence for cooperation and kin selection in natural populations of  
69 bacteria (12–15). The extent to which bacteria cooperate and interact with close relatives is  
70 likely to be highly dependent upon environmental conditions. It is hard to know whether the  
71 artificial environments and gene knockouts of lab experiments are representative of natural  
72 populations. Experiments have also shown that some traits can be cooperative in some  
73 environments but private in others (16). Across species comparative studies have shown that  
74 cooperation is more common in species where relatedness is higher (17, 18), but this doesn't

75 help us determine whether specific traits are evolving as cooperative public goods. For this, we  
76 need a way to study bacteria in their natural environment.

77

78 Molecular population genetics offers a promising method to test for cooperation and kin  
79 selection in natural populations. Theory predicts that kin selection leaves a distinct signature  
80 (footprint) of selection in genomes (Figure 1) (19–23). If a gene encodes a trait that provides a  
81 direct benefit to the individual performing that trait, then the cells which perform that trait carry  
82 the gene for that trait. Similarly, in a clonal population, relatedness between cells is  $r = 1$ , and  
83 so the cells which benefit from cooperation also carry the cooperative gene. If instead,  
84 relatedness between cells is  $r < 1$ , the cells which benefit from cooperation won't always carry  
85 the gene for cooperation. This dilution of the benefit of cooperation leads to relaxed (reduced)  
86 selection, relative to directly beneficial traits or in a clonal population ( $r = 1$ ).

87

88 The relaxed selection when  $r < 1$  results in an increased probability of fixation for deleterious  
89 mutations, and a decreased probability of fixation for beneficial mutations (14-16). The  
90 consequence of this change in fixation probabilities, when  $r < 1$ , is that it would lead to increased  
91 polymorphism and divergence in cooperative genes relative to genes that have direct fitness  
92 effects (Figure 1). Consequently, by examining patterns of polymorphism and divergence, we  
93 can test for signatures of cooperation favoured by kin selection. This method has been applied  
94 in microbes to the social amoeba *Dictyostelium discoideum* with mixed results, although  
95 relatedness is close to  $r = 1$  in that species, and so we might not expect to a significant signature  
96 of kin selection (24–27). We have also previously applied this method to the opportunistic  
97 pathogen *Pseudomonas aeruginosa*, and found evidence for cooperative traits favoured by kin  
98 selection (28). A key advantage of this method is that it solves the problem caused by traits that  
99 are only cooperative in certain contexts, as the signature of selection will represent the average  
100 conditions experienced over time.

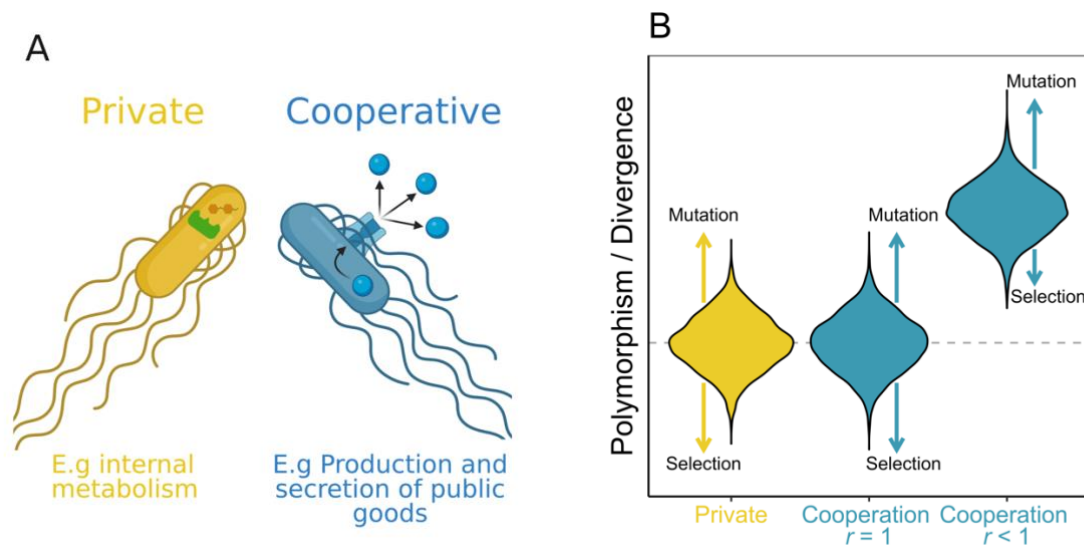

**Figure 1:** Population genetic theory for cooperative traits. (A) Representation of the categorisation of traits as private (yellow) or cooperative (blue). Cooperative traits involve the production and secretion of molecules whose fitness benefits are shared with other nearby cells. Private traits are those whose fitness benefits are only felt by the individuals expressing the trait (B) Prediction for relative polymorphism and divergence for private (yellow) and cooperative (blue) genes. If relatedness,  $r=1$ , then cooperative genes (middle blue violin) should have the same polymorphism and divergence as private genes (left yellow violin). In contrast, if  $r<1$  then cooperative genes (right blue violin) should show greater polymorphism and divergence than private genes. Figure based on (19, 21).

101 However, there were two potential problems with the only previous analysis with bacteria, on  
102 *P. aeruginosa* (28). Firstly, the genomes had been collected over several decades, and from six  
103 different continents. The underlying population genetic theory assumes that all genomes are  
104 sampled from a single population, at a single time point. Violating this assumption could have  
105 led to biased or spurious results (29). Secondly, we were unable to directly control for gene  
106 expression. If a gene is only occasionally expressed, in certain conditions, then this can also  
107 lead to relaxed selection, with increased polymorphism and divergence (21). Belcher *et al.*  
108 lacked data on gene expression, and so controlled for this problem by making targeted  
109 comparisons between cooperative and private traits that they argued were likely to be expressed  
110 at different rates (28). If their assumptions did not hold, and expression rates differed, then then  
111 their patterns could alternatively be explained by gene expression rather than kin selection for  
112 cooperation.

113

114 We were able to address these problems by taking advantage of two recently developed data  
115 sets in the bacteria *Bacillus subtilis*. *B. subtilis* is found in soil and the gastrointestinal tracts of  
116 several animals, including humans, and is used on an industrial scale by biotechnology

117 companies (30). A number of laboratory studies have suggested that *B. subtilis* is a highly  
118 cooperative species, which secretes a number of potentially cooperative enzymes (31–34).  
119 First, we used a natural population consisting of 31 environmental isolates collected as part of  
120 a citizen science project in Dundee, Scotland (35) (Supplementary Table 1). All of these strains  
121 were collected from the wild around the same time, and from similar niches. Second, we were  
122 able to directly control for gene expression rates, by using two genome-wide studies of gene  
123 expression across several timepoints during biofilm formation (36, 37). Taken together, these  
124 studies allow us to satisfy the assumptions of the underlying population genetic theory.

125

## 126 **Results & Discussion**

127

128 We compared genes controlling traits that are hypothesised to be cooperative, with traits that  
129 are hypothesised to be private. We identified six different types of putatively cooperative  
130 behaviour, where an appropriate comparison could be made with genes controlling private  
131 traits, that are likely to be expressed at similar rates (Table 1). We used the first type, quorum  
132 sensing (QS), for the main analysis, and we summarise the other five types at the end of the  
133 results section.

134

### 135 *Quorum Sensing*

136 We started by examining genes induced by the ComQXPA quorum sensing (QS) signalling  
137 system (33, 34). This system regulates gene expression in response to the density of a diffusible  
138 signal molecule. At high cell densities, the density of the signal molecule increases, causing  
139 ComA to activate, and the upregulation of a number of traits (38–41). We categorized genes as  
140 cooperative or private based on a search of the literature in *B. subtilis* (Methods). For example,  
141 the fifteen genes coding for the exopolysaccharide EPS are classed as cooperative. EPS is the  
142 main biofilm matrix component (42), and is required for biofilm formation (43). EPS is costly  
143 to produce, it provides benefits to non-producers, and non-producers can exploit producers  
144 (44). This is a classic public good. Similarly, TasA, a protein fibre that is needed for biofilm  
145 structural integrity (45, 46), has also been shown in lab experiments to be a public good (32).  
146 Mutants lacking either EPS or TasA can also complement each other, private further evidence  
147 that the benefits of these genes are shared (47). Private genes include those coding for traits  
148 such as asparagine synthase (AsnB), which controls peptidoglycan hydrolysis for cell growth  
149 and cell-wall synthesis (48).. We found that quorum sensing controls a mixture of private and

150 cooperative traits in *B. bacillus*, categorizing N=25 of our quorum sensing-controlled genes as  
151 cooperative, and N=153 as private (Supplementary Table 2).

152 We started by focusing on quorum sensing because it offers a number of advantages for our  
153 purpose. First, the large size and nature of this network means that there are sufficient private  
154 and cooperative genes for a targeted analysis (N=153 & N=25 respectively). Second, shared  
155 control by the same signalling system means that private and cooperative genes controlled by  
156 the quorum sensing system are likely to have similar levels of expression (49, 50).. Third, there  
157 is data on gene expression allowing us to directly compare expression rates (36). Fourth, the  
158 coregulation of genes acts as a control for mutations in noncoding regulatory and promoter  
159 regions that could affect the production of cooperative public goods.

160  
161 *QS: Controlling for conditional expression*

162  
163 Differential gene expression can also influence the strength of selection and so needs to be  
164 controlled for. Theory tells us that the fraction of generations in which a trait is expressed can  
165 determine the extent to which selection is relaxed (21). To control for this, we need to compare  
166 genes that are switched on or off in the same conditions. Shared control by the same signalling  
167 system means that private and cooperative genes controlled by the quorum sensing system are  
168 likely to have similar levels of expression. We were, however, also able to test this assumption  
169 directly by examining two data sets on gene expression (36, 37). Gene expression depends  
170 strongly upon environmental conditions and so there is no single rate of gene expression for  
171 each gene.

172  
173 Futo *et al.* measured gene expression at 11 different points in the formation of a biofilm, and  
174 normalised their results to the median to convert expression levels to the same scale (36). This  
175 gives us an excellent dataset to test our control for conditional expression, as we can use simple  
176 correlations between pairs of genes to see if they are up- and down-regulated at the same time.  
177 For our 178 private and cooperative genes, there are 15753 unique pairs of genes. The average  
178 correlation in gene expression for a pair of these genes is 0.302 (Spearman's correlation). We  
179 then used a bootstrap approach to see if this correlation was greater or lower than for randomly  
180 chosen genes. We took a random set of 178 genes and calculate mean pairwise correlation in  
181 the same way, and repeated 10000 times. We found that the mean pairwise Spearman's  
182 correlation was 0.251 for the random (bootstrap) samples, and that the correlation in expression

183 of our quorum sensing-controlled genes was higher than 99.7% of our bootstrap samples  
184 (Figure 2). Consequently, our candidate set of genes have expression rates that are correlated  
185 significantly higher than expected by chance, supporting our choice for their use in an analysis  
186 of signature of selection ( $p < 0.004$ ).

187

188 Pisithkul provided a different dataset measuring gene-expression in biofilms (37). Whereas  
189 Futo measured expression over two months in a biofilm with a solid-air interface, Pisithkul  
190 focussed on the initial stages of biofilm growth, measuring expression over 24 hours in a  
191 biofilm with a liquid--air interface. We again found that quorum sensing-controlled genes have  
192 expression rates that are correlated significantly higher than expected by chance ( $N=160$  genes,  
193  $p < 0.02$ ; Supplement S11).

194

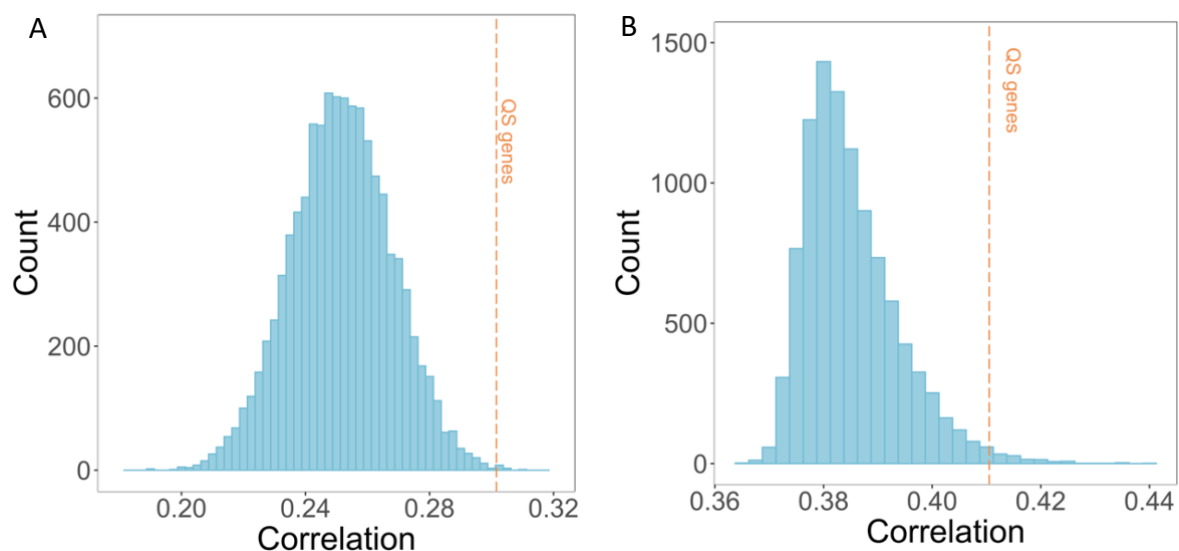

**Figure 2:** Average correlation in gene expression between genes during biofilm growth. **(A)** Correlation across 11 timepoints of biofilm formation for randomly sampled gene sets of the same size as our quorum sensing-controlled genes ( $N=178$ ). Data from Futo et al. (2021).

**(B)** Correlation across 8 timepoints of biofilm formation for randomly sampled gene sets of the same size as our quorum sensing-controlled genes ( $N=160$ ). Data from Pisithkul et al. (2019). In both panels, the orange line shows the average correlation for the quorum sensing-controlled genes, which is  $>99.7\%$  of our random samples for panel A, and  $>98.5\%$  of random samples for panel B.

195

196 *QS: Polymorphism*

197

198 We found that genes for putatively cooperative traits had significantly greater polymorphism  
199 than genes for private traits (Figure 3; ANOVA  $F_{2,61} = 11.82, p < 0.0001$ ; Games Howell Test  
200  $p < 0.001$ ;  $N=25$  cooperative genes,  $N=153$  private genes). Cooperative genes also had  
201 significantly greater polymorphism when we only examined only non-synonymous sites

202 (Kruskal-Wallis  $X^2(2) = 10.7, p < 0.01$ ; Dunn Test  $p=0.0240$ . Figure 4a), or only synonymous  
203 sites (ANOVA  $F_{2,61} = 7.30, p < 0.01$ ; Games Howell Test  $p=0.007$ ) (Figure 4b).

204

205 The trend for greater synonymous polymorphism is possibly surprising as such sites should be  
206 under much weaker selection, and we wouldn't necessarily expect to see an effect of kin  
207 selection. However we also found this pattern in *P. aeruginosa* (28). There is some evidence  
208 that differences in use of preferred codons between cooperative and private genes could explain  
209 this pattern (Supplement S1). Synonymous mutations can also have substantial fitness effects  
210 on social traits (51–54).

211

212 The ratio between non-synonymous and polymorphism does not differ between cooperative  
213 and private genes (Kruskal-Wallis  $X^2(2) = 6.97, p = 0.0306$ ; Dunn Test  $p=0.183$ .  
214 Supplementary Figure 1), which reflects the fact that cooperative genes have elevated diversity  
215 at both types of site, possibly due to the large fitness effects of many traits (both cooperative  
216 and private) that are quorum sensing-controlled (55, 56) (Supplement S2).

217

218

219

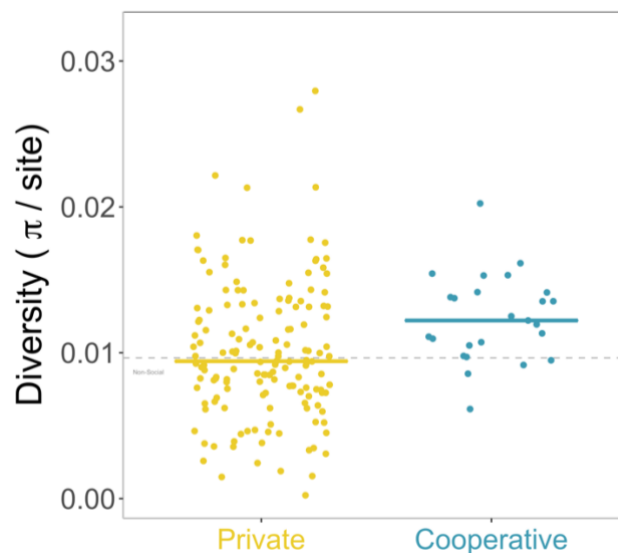

**Figure 3:** Nucleotide diversity per site for private (yellow) and cooperative (blue) genes controlled by quorum sensing. Each point is a gene, and the horizontal line shows the median for each group. The grey line shows the median for background private genes across the genome.

220

221



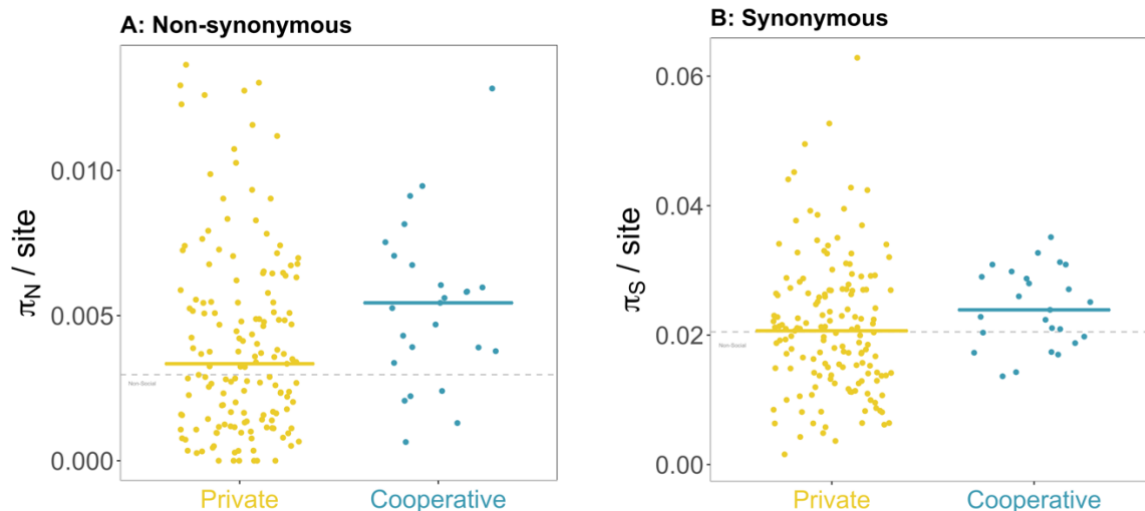

**Figure 4:** Nucleotide diversity at non-synonymous (A) and synonymous (B) sites for private (yellow) and cooperative (blue) genes controlled by quorum sensing. Each point is a gene, and the horizontal line shows the median for each group. The grey line shows the median for background private genes across the genome.

222

223 As an additional control, we were able to repeat all of these analyses comparing cooperative  
224 quorum sensing genes against a different group of private genes not controlled by quorum  
225 sensing (N=1832). This different set of N=1832 private genes, which we call ‘background  
226 genes’ are those which aren’t controlled by quorum sensing and whose products are found in  
227 the cytoplasm, where they are least likely to have a cooperative function. In all cases we found  
228 the same pattern, with cooperative quorum-sensing genes showing elevated polymorphism  
229 compared to background genes (Supplement S2).

230

231 *QS: Divergence*

232

233 We found that cooperative genes had significantly greater divergence compared to private  
234 genes at both at non-synonymous and synonymous sites (Non-synonymous: Kruskal-Wallis  
235  $\chi^2(2) = 10.4, p = 0.006$ ; Dunn Test  $p=0.00553$ ; Figure 5a; Synonymous: ANOVA  $F_{2,59} =$   
236  $7.26, p < 0.01$ ; Games Howell Test  $p=0.011$ ; Figure 5b). We examined synonymous and non-  
237 synonymous sites separately because we measure divergence through rates of protein  
238 evolution. A signature of selection can be found at both synonymous and non-synonymous  
239 sites, implying that synonymous variation is not neutral (26, 28). Because divergence is  
240 elevated at both types of site (similar to polymorphism), there is no difference in the ratio of  
241 non-synonymous to synonymous divergence (Kruskal-Wallis  $\chi^2(2) = 13.32, p = 0.00128$ ;  
242 Dunn Test  $p=0.189$ . Supplementary Figure 2), although both sets of quorum sensing genes  
243 have a higher ratio than the background genes (Supplement S2). This could reflect stronger  
244 selection on quorum sensing traits than background traits on average.

245

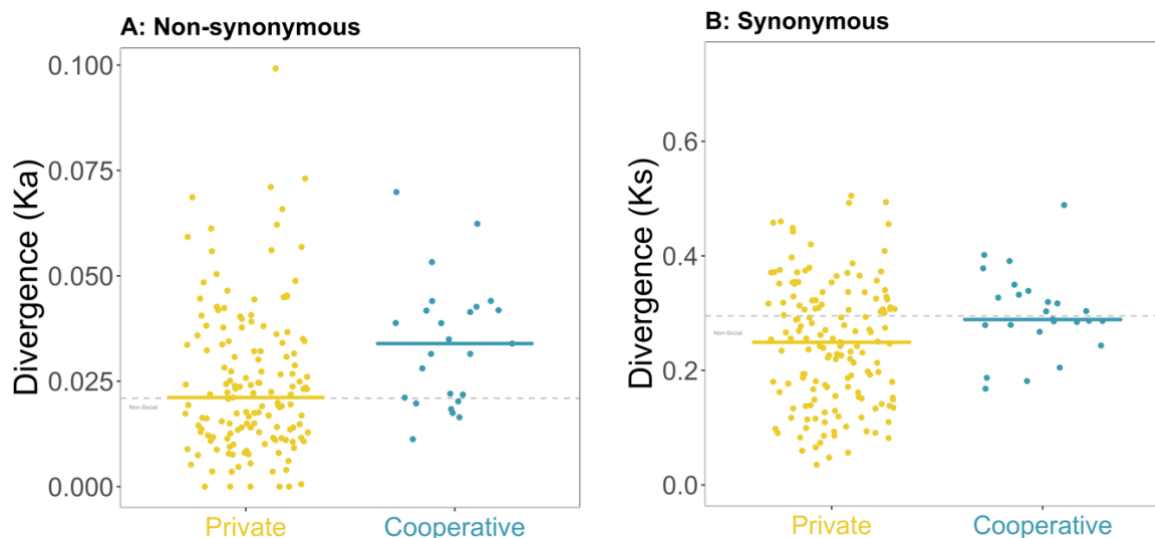

**Figure 5:** Divergence at non-synonymous (A) and synonymous (B) sites for private (yellow) and cooperative (blue) genes controlled by quorum sensing. Divergence is measured by rates of protein evolution, e.g. number of synonymous substitutions per synonymous site for panel B. Each point is a gene, and the horizontal line shows the median for each group. The grey line shows the median for background private genes across the genome.

246

247

#### 248 *Alternative hypotheses*

249

250 We were also able to eliminate alternative explanations for the patterns that we observed with  
251 both polymorphism and divergence (Figures 3-5). Greater polymorphism would also have been  
252 expected if cooperative genes were more likely to be experiencing balancing or frequency  
253 dependent selection, while greater divergence would arise from positive/directional selection  
254 leading to fixation of adaptive mutations (19, 20). Alternatively, the pattern we observed could  
255 have been caused by other differences between putatively cooperative and private genes. We  
256 assessed these alternative hypotheses by testing other predictions that they make.

257

258 First, we found no evidence that cooperative genes were more likely to be under balancing  
259 selection, which would lead to a deficit of rare alleles in the population (Tajima's D, Fu & Li's  
260 F, Fu & Li's D, Supplement S3). Second, we found no evidence that cooperative genes are  
261 more likely to be under positive selection, which would lead to an excess of non-synonymous  
262 divergence compared to non-synonymous polymorphism, as adaptive mutations would quickly  
263 spread and only be detected as divergence (McDonald-Kreitman test, Neutrality Index,  
264 Direction of Selection statistic, Supplement S4). Third, we found no evidence that the patterns  
265 observed are due to any differences in gene length or likelihood of horizontal gene transfer  
266 between cooperative and private genes, or a lack of statistical power (Supplement S5). Fourth,

267 we found no evidence that our results could be explained by noise due to variation in the  
268 recombination rate. The set of strains that we analysed vary in genetic competence, the ability  
269 to take up DNA from the environment (35), which is a form of recombination in bacteria. This  
270 variation in competency could create noise in our population genetic measures that focus on  
271 SNPs, due to the variation in recombination. Considering the 31 strains we analysed, 18 are  
272 genetically competent (35). We conducted an analysis of polymorphism and divergence using  
273 only the competent strains, and found the same patterns as when we use all strains (Supplement  
274 S7).

275  
276 Finally, we found no evidence that the patterns we observed could be caused by division of  
277 labour (57–60), which is a cooperative hypothesis not mutually exclusive with kin selection.  
278 In *B. subtilis* biofilms, some cells will produce the polysaccharide EPS, and some will produce  
279 TasA amyloid fibres (61). Mutants lacking cannot grow alone but can grow together (32). The  
280 extra level of conditional expression in these public goods (over that caused by being quorum  
281 sensing-controlled), could leave a signature of relaxed selection that isn't caused by kin  
282 selection. To investigate this possibility, we took advantage of the fact that this heterogeneity  
283 is ultimately caused by Spo0A. Spo0A is a bistable switch that is active in only a subset of cells  
284 (61, 62) and activates SinR anti-repressors which control the operons for both EPS and TasA  
285 (32, 63, 64). If the extra conditionality of division of labour was causing an effect, we would  
286 expect that genes under the control of Spo0A (N=20) would have greater polymorphism than  
287 other quorum sensing-controlled genes (N=157), but this is not the case (Supplement S6). We  
288 note that the cooperative genes EPS and TasA that are known to have division of labour both  
289 stand out as highly polymorphic within the genes controlled by Spo0A, providing support to  
290 our hypothesis that sociality causes the effect. We note that the cooperative genes EPS and  
291 TasA that are known to have division of labour both stand out as highly polymorphic within  
292 the genes controlled by Spo0A, providing support to our hypothesis that sociality causes the  
293 effect.

#### 294 295 *Other Cooperative Traits*

296  
297 Our above analyses have provided strong evidence for relaxed selection due to kin selection  
298 for cooperation, considering genes controlled by quorum sensing. We then tested if the same  
299 pattern was found in five other types (groups) of traits, where we could compare genes for  
300 putatively private and cooperative traits, that are likely to be expressed at similar rates (Table  
301 1; Figure 6). The extent to which the distinction between private and cooperative traits can be

302 made varies across these other groups of traits. Consequently, we might not expect to see a  
303 signature of kin selection in every case, and so our aim is to see if there is a relatively consistent  
304 pattern.

305

306 First, *B. subtilis* produces and secretes a siderophore named bacillibactin, which binds to iron  
307 in the environment (65, 66) (Figure 6b). The bound complex can be taken into the cell, but is  
308 also available to non-producers, and is therefore a public good. We separated the genes  
309 involved in the bacillibactin pathway into cooperative and private components, with: genes  
310 involved in biosynthesis and export classed as cooperative, and those involved in uptake and  
311 release of bound iron classed as private. Second, *B. subtilis* exhibits resistance to antimicrobials  
312 by either pumping intact antibiotics outside the cell (private), or by producing enzymes such  
313 as beta-lactamases that detoxify the environment for the entire community (67–69)  
314 (cooperative; Figure 6c).

315

316 Third, *B. subtilis* produces proteases to break down proteins, with different proteases acting  
317 either inside the cell (private), or secreted to act outside the cell (70–72) (cooperative; Figure  
318 6d). Fourth, *B. subtilis* produces toxins which can either be contact-dependant (relatively  
319 private), or diffusible throughout the community (cooperative public goods; Figure 4d).  
320 However, this comparison is relative, and possibly weak, as killing cells with contact-  
321 dependant toxins can also provide a cooperative benefit to other local cells, that experience  
322 reduced competition. Fifth, *B. subtilis* has a number of antimicrobial traits which are more  
323 defensive against predators without affecting the predators' growth (private) and those which  
324 are more offensive against competitors (cooperative) (73, 74). This is also a weak comparison,  
325 as bacillaene (the defensive molecule) is secreted from cells, and so likely also has some  
326 cooperative component. However, the defensive traits provide a relatively more private benefit  
327 in providing personal protection, whereas the removal of competitors by the offensive traits  
328 provides a relatively more cooperative benefit. For all comparisons, we find that the set of  
329 genes have significantly correlated expression, using the same methodology and data as for the  
330 comparison with quorum sensing genes (Supplement S9) (36).

331

332

333

334

335

336 **Table 1:** Traits used for comparisons of cooperative vs. private genes. The full gene lists are  
 337 in supplementary tables 2-7.

| Trait                              | Private genes                                                                                                                     | Cooperative genes                                                                                              |
|------------------------------------|-----------------------------------------------------------------------------------------------------------------------------------|----------------------------------------------------------------------------------------------------------------|
| <b>1. Quorum sensing traits</b>    | Genes which only affect the fitness of the producing cell (N=25)                                                                  | Genes for public goods that potentially provide benefits to the local group of cells (N=153)                   |
| <b>2. Iron scavenging</b>          | Genes for uptake and use of iron via the <i>B. subtilis</i> siderophore bacillibactin (N=5)                                       | Genes for biosynthesis and secretion of bacillibactin (N=5)                                                    |
| <b>3. Antimicrobial resistance</b> | Genes for ABC transporters involved in multi-drug resistance. These genes transport the intact antibiotic outside the cell (N=11) | Genes for enzymes that deactivate beta-lactam and aminoglycoside antibiotics outside the cell (N=3)            |
| <b>4. Proteases</b>                | Genes for intracellular proteases, which are likely to be involved in processing and regulation of proteins within the cell (N=9) | Genes for extracellular proteases, which are likely to be involved in collective feeding and motility (N=8)    |
| <b>5. Toxins</b>                   | Genes for contact-dependant LXG toxins, which are delivered by a Type VII secretion system (N=6)                                  | Genes for the secreted toxin bacilysin, which is activate against a broad range of bacterial competitors (N=8) |
| <b>6. Antimicrobial activity</b>   | Genes for the secondary metabolite bacillaene, which inhibits predation by <i>M. xanthus</i> (N=13)                               | Genes for the secondary metabolite plipistatin, which is active against fungal competitors (N=4)               |

338

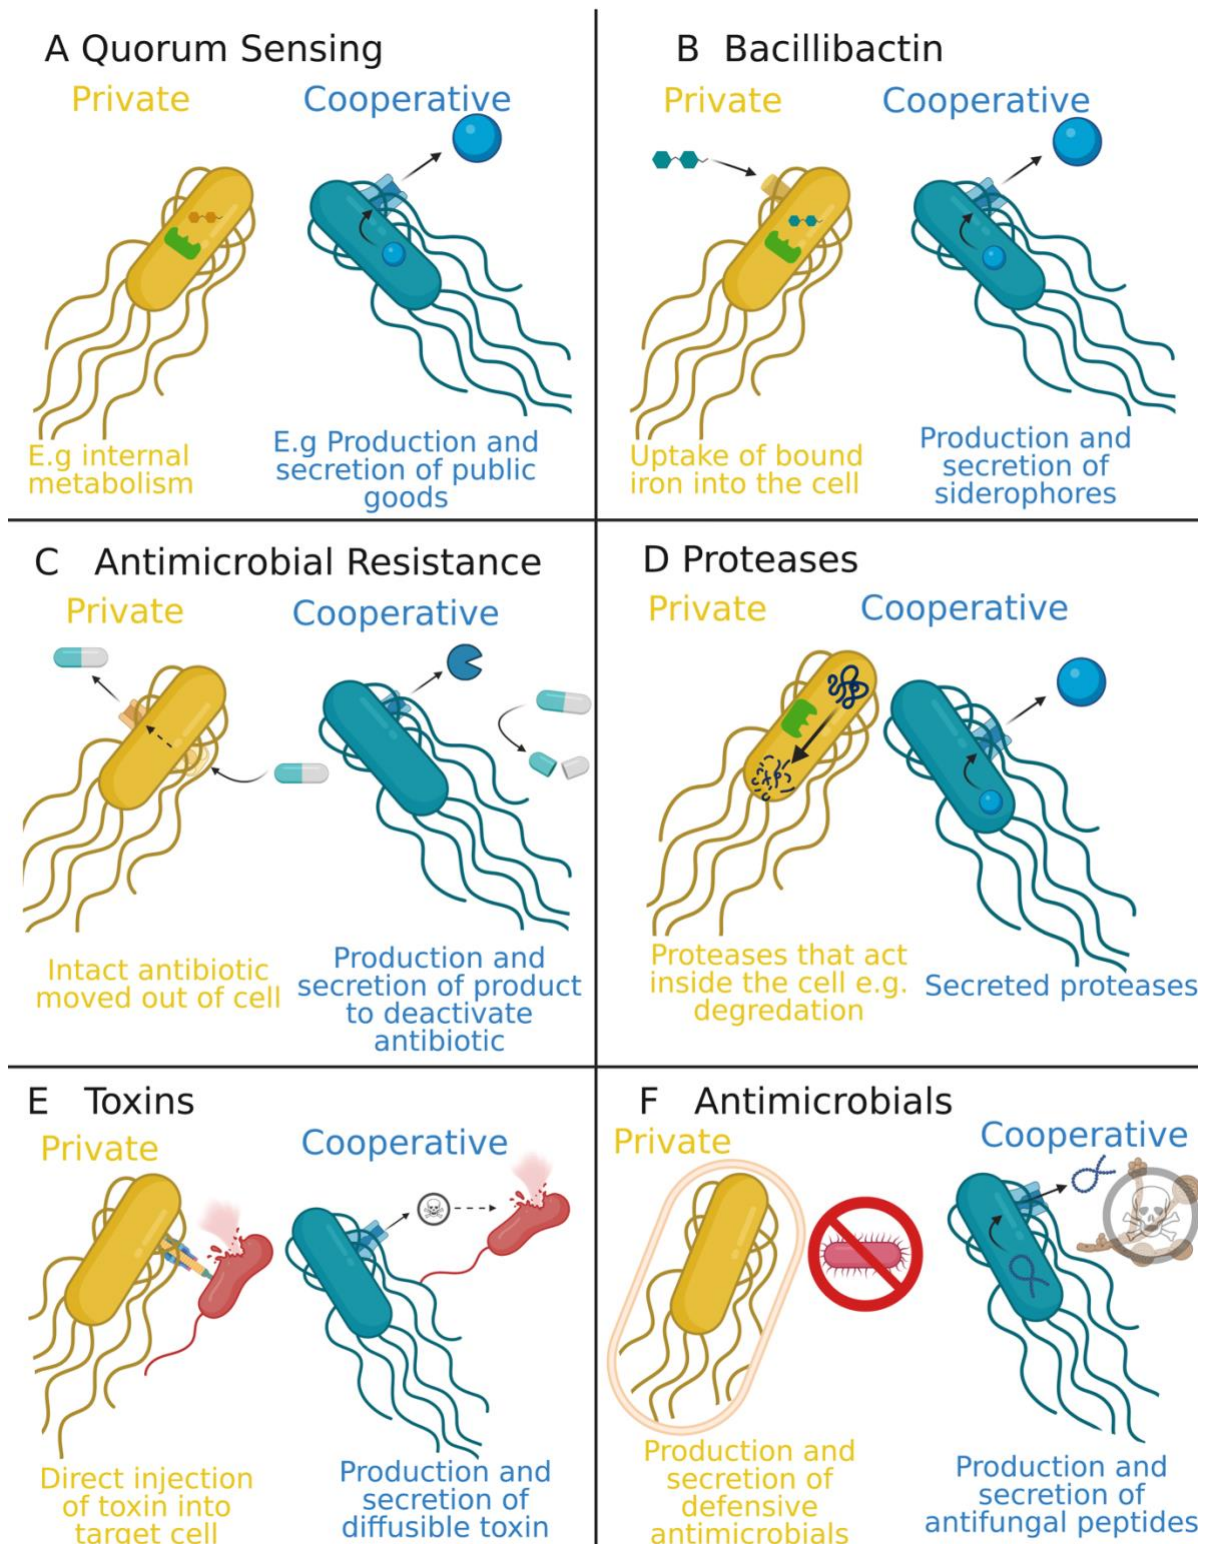

**Figure 6:** Diagram of how traits are categorised as either private (yellow) or cooperative (blue). Panel (A) shows categorisation of quorum sensing controlled traits for the main analysis, with private traits giving fitness benefits only to those expressing the gene, and cooperative traits giving fitness benefits that can potentially be shared with other cells. Panels B-F show other cooperative traits; (B) Bacillibactin (iron scavenging). (C) Antimicrobial resistance. (D) Proteases. (E) Toxins. (F) Antimicrobials. Note that for some of these comparisons it is the relative level of sociality that is different. Figure created with BioRender.com

339 The number of cooperative genes was too small to analyse each case separately – for example,  
340 the iron-scavenging comparison involves only 10 genes (5 private and 5 cooperative).  
341 Consequently, we examined the data in three ways. First, we grouped all cooperative genes  
342 together into one set (N=52) and compared them to the grouped private genes across all  
343 comparisons (N=194). Second, we grouped all of the cooperative genes from just the five new  
344 comparisons (i.e. not quorum sensing) (N=27), and compared them to the private genes from  
345 these five comparisons (N=41). Third, we consider each of the six categories of cooperative  
346 vs. private genes (Table 1) as its own data point (N=6).

347

#### 348 *Other Cooperative Traits: Polymorphism and divergence*

349

350 We found that polymorphism was consistently higher in cooperative genes than in private  
351 genes (Figure 7). This pattern is consistent across the three different ways that we can analysed  
352 our data: all genes comparison (ANOVA  $F_{2,127} = 10.59, p < 0.0001$ ; Games Howell Test  
353  $p < 0.001$ ); just the genes for the social traits other than quorum sensing (ANOVA  $F_{2,47} =$   
354  $5.94, p < 0.01$ ; Games Howell Test  $p < 0.01$ ); and the six categories comparison (Wilcoxon  
355 signed-rank test  $V=21, p=0.031$ ).

356

357 Polymorphism at non-synonymous sites is also significantly higher in cooperative genes than  
358 in all private genes. This pattern is consistent across the three different ways that we can  
359 analysed our data: all genes comparison (Kruskal-Wallis  $\chi^2(2) = 19.71, p <$   
360  $10^{-4}$ , Dunn Test  $p < 10^{-4}$ ); just the genes for the social traits other than quorum sensing  
361 (Kruskal-Wallis  $\chi^2(2) = 9.90, p < 0.01$ , Dunn Test  $p < 0.01$ ); and the six categories comparison  
362 (Wilcoxon  $V=21, p=0.031$ ) (Supplementary Figure 3).

363

364 Polymorphism at synonymous sites is also significantly higher in all cooperative genes than in  
365 all private genes when analysing all genes (ANOVA  $F_{2,130} = 4.21, p = 0.016$ ; Games Howell  
366 Test  $p=0.019$ ). However, this trend was not significant when examining just the genes for the  
367 social traits other than quorum sensing (ANOVA  $F_{2,47} = 2.28, p = 0.113$ ; Games Howell Test  
368  $p=0.10$ ), or when using categories as data points (synonymous polymorphism is marginally  
369 higher in private genes than cooperative genes for the iron-scavenging and AMR categories;  
370 Wilcoxon  $V=18, p=0.156$ ). We would expect the pattern to be weaker with synonymous  
371 polymorphism, as these sites are likely to be under weaker selection.

372

373 Non-synonymous divergence is significantly greater in all cooperative genes compared to all  
374 private genes. This pattern is consistent across the three different ways that we can analysed  
375 our data: all genes comparison (Kruskal-Wallis  $X^2(2) = 22.9$ ,  $p < 10^{-4}$ , Dunn Test  $p < 10^{-4}$ ); the  
376 genes for the social traits other than quorum sensing (Wilcoxon  $V=21$ ,  $p=0.031$  Supplementary  
377 Figure 5); and the six categories comparison (Kruskal-Wallis  $X^2(2) = 14.7$ ,  $p <$   
378  $0.001$ , Dunn Test  $p < 0.001$ ). As would be expected, the pattern is more mixed for synonymous  
379 divergence. Whilst synonymous divergence is significantly greater in all cooperative genes  
380 compared to all private genes (ANOVA  $F_{2,125} = 8.33$ ,  $p < 0.001$ ; Games Howell Test  $p < 0.01$ ),  
381 this isn't the case when examining just the genes for the social traits other than quorum sensing  
382 (ANOVA  $F_{2,45} = 2.10$ ,  $p = 0.13$ ; Games Howell Test  $p=0.39$ ), or the six categories comparison  
383 (Wilcoxon  $V=13$ ,  $p=0.688$ ) (Supplementary Figure 6). Similarly, the ratio between non-  
384 synonymous and synonymous divergence is significantly greater in all cooperative genes  
385 compared to all private genes (Kruskal-Wallis  $X^2(2) = 25.0$ ,  $< 10^{-5}$ , Dunn Test  $p = 0.021$ ), but  
386 not when we just looked at the genes for the social traits other than quorum sensing (Kruskal-  
387 Wallis  $X^2(2) = 13.2$ ,  $< 0.01$ , Dunn Test  $p = 0.11$ ) or the six categories comparison (Wilcoxon  
388  $V=18$ ,  $p=0.156$ ) (Supplementary Figure 7). This may reflect differences in selection on  
389 synonymous variation on different traits, or the weakness of some of these comparisons due to  
390 small sample sizes. We confirmed that none of our cooperative vs. private comparisons show  
391 significant differences in balancing or positive selection (Supplement S10), suggesting that  
392 what we are seeing is a signature of kin selection, and that we may just lack power in our other  
393 comparisons.

394

395 Overall, these results incorporating other traits in addition to quorum sensing controlled genes,  
396 provide support to the main result that there is a signature of kin selection for cooperation  
397 (Figures 3-5). Nonetheless, the *a priori* distinction between private and cooperative traits is  
398 weaker for some comparisons, and we could expect exceptions within the overall pattern. The  
399 main exception in our analyses was toxin comparison, where we compared contact-dependant  
400 LXG toxins (N= 6 genes) to the secreted antimicrobial bacilycin (N=8 genes). Both of these  
401 sets of genes are involved in competition in biofilms, and both are controlled by the DegS-  
402 DegU system, so likely expressed at similar rates (75, 76). Possible confounding factors in this  
403 case include the fact that although we classified the contact-dependent toxins as private, they  
404 also provide cooperative benefits to local cells by eliminating competitors. The LXG toxins



405 also stand out because three of them are on phage elements (75), and it may be that the strength  
406 or type of selection is different on these genes, masking any effect of sociality.

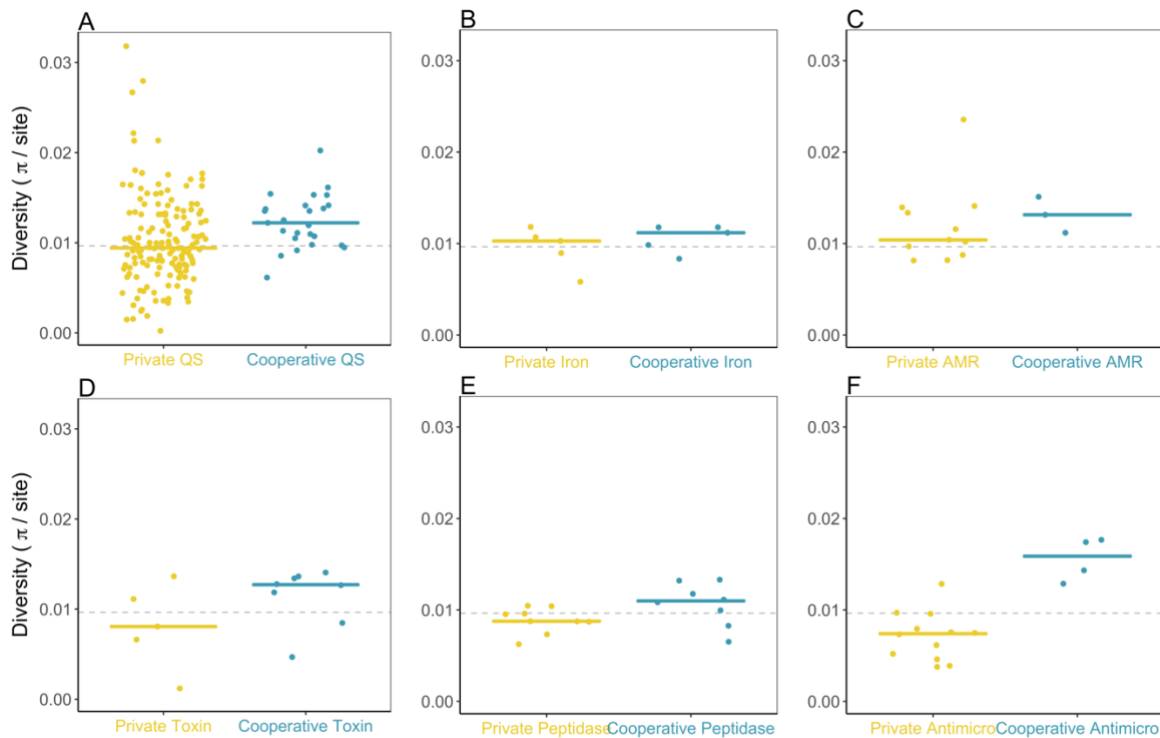

**Figure 7:** Private (yellow) vs. cooperative (blue) polymorphism in genes for six traits. Panel A shows the quorum sensing-controlled genes used in the main analysis. Panels B-F show the other cooperative traits.

407

408 *All traits: Deleterious mutations*

409 As an additional robustness test for our conclusions, we analysed deleterious mutations. If kin  
410 selection is favouring cooperation, we should also observe more deleterious mutations in genes  
411 controlling cooperative traits compared to private traits. This is because relaxed selection slows  
412 the rate at which deleterious mutations are purged from the population (19, 20, 22). We tested  
413 this prediction by looking for loss-of-function mutations, that generate stop codons or  
414 frameshift mutations, and hence act as deleterious mutations, in our SNP data. We repeated  
415 this analysis with two different data sets.

416 First, we used all cooperative genes from our six comparisons in Table 1. We measured how  
417 many cooperative and private genes have deleterious mutations, and compared this to an  
418 expectation based on their relative frequency across the genome. Cooperative genes were  
419 significantly more likely than private genes to have deleterious mutations ( $\chi^2(1) = 12.3, p <$   
420  $0.001$ ). This pattern also holds if we count total number of deleterious mutations, rather than  
421 just presence or absence ( $\chi^2(1) = 11.0, p < 0.001$ ).

422 To test the robustness of this result, we repeated the analysis using the localization prediction  
423 tool PSORTb to categorize genes for extracellular proteins as ‘cooperative’, and genes for  
424 proteins that aren’t secreted as ‘private (77)’. This method has been previously used in several  
425 studies to estimate whether genes are for cooperative (social) or private traits (78, 79). By using  
426 PSORTb we are able to analyse all genes, which increases our sample size and statistical power.  
427 We removed the 17% of all genes with unknown localization, leaving us with a set of genes of  
428 known sociality. We found deleterious mutations in 293 genes, of which 17 are cooperative  
429 (5.8%). This is significantly more than expected given that cooperative genes only make up  
430 2.0% of genes (binomial test  $P < 0.001$ ), matching our prediction that deleterious mutations  
431 should be biased towards cooperative genes. If we count total deleterious mutations (rather  
432 than number of genes with at least one) we see the same pattern, with cooperative genes making  
433 up 5.5% of mutations (20 of 361).

#### 434 *Relatedness estimation*

435 The genetic relatedness between interacting cells ( $r$ ) is a key parameter for social evolution.  
436 Relatedness can be very hard to estimate for natural populations of bacteria and other microbes,  
437 except for extreme cases where interactions take place in some physical structure such as a  
438 fruiting body or a filament (80, 81). Population genetic data allows relatedness to be estimated  
439 indirectly, because the degree to which selection is relaxed, and greater polymorphism will be  
440 observed, depends upon the relatedness between interacting cells. Consequently, we can work  
441 backwards from the polymorphism data to obtain an indirect estimate of relatedness (28).  
442 Examining the polymorphism data from all genes, we estimated relatedness to be  $r = 0.77$  (95%  
443 CI 0.67-0.91) (Supplement S8). This estimate assumes that both the magnitude of selection and  
444 the distribution of selection coefficients is the same on average for cooperative and private  
445 genes. An advantage of this indirect method for estimating relatedness is that it does not require  
446 knowledge about factors that would be hard or impossible to measure in natural populations.  
447 For example, the spatial details of how cooperative interactions play out, such as how far do  
448 public goods diffuse, and who benefits, as well as how much these vary in different  
449 environments, and the frequency with which different environments are encountered (28, 82).  
450 Indeed, cooperative traits in *B. subtilis* vary in the degree to which they are shared depending  
451 on whether groups are exhibiting sliding motility or growing in biofilms (16). In contrast, the  
452 indirect measure provided by population genetics represents an average for the different  
453 cooperative traits, over the different environments encountered, over evolutionary time.

## 454 **Conclusions**

455 We have found strong evidence of kin selection for cooperation in a natural population of *B.*  
456 *subtilis*. Our analyses controlled for possible confounding factors, such as expression rate, and  
457 eliminated alternative explanations for polymorphism and divergence, providing evidence that  
458 complements the lab experiments demonstrating sociality in this species (32, 42–46, 61, 83–  
459 86). Taken together with a previous study, population genetic analyses have now provided  
460 evidence of kin selection for cooperation in both a gram-positive (*B. subtilis*) and a gram-  
461 negative (*P. aeruginosa*) bacteria (28). These results suggest convergent, and potentially  
462 widespread, kin selection for cooperation, based on very different underlying mechanisms,  
463 across bacteria.

464

465 A possible complication with studying cooperation in bacteria is that the extent to which traits  
466 are cooperative, and their importance for fitness, can depend greatly upon environmental  
467 conditions (8, 87–90). One advantage of the molecular population genetic approach that we  
468 have used is that it averages across different environments over evolutionary time.  
469 Consequently, rather than examining a specific environment, it provides an ‘average’ answer.  
470 In the case of *B. subtilis*, for the traits that we have examined, we have found evidence of kin  
471 selection for cooperation, with an estimated average relatedness of  $r=0.77$ .

472

473

474

## 475 **Acknowledgements**

476

477 We thank: Ming Liu and Ákos Kovács for useful discussion and comments on the manuscript.  
478 This work was supported by the European Research Council (834164: LJB, AED & SAW;  
479 SESE: MG).

480

481

482

483

484

485

486

487

488

489

490

491

## 492 Material & Methods

### 493 Strains

494

495 We use the whole-genome sequences of 31 strains of *Bacillus subtilis* from (35). The strains  
496 are environmental isolates, collected from a citizen science project in Dundee where people  
497 brought soil samples from their garden. *B. subtilis* is most commonly found in soil, but is also  
498 found living as a commensal in animal intestines (91), and in marine environments (92).. Whilst  
499 durable spores than can disperse through the air can allow long-distance migration (93), and  
500 strains don't phylogenetically cluster based on environment (94), several factors are in favour  
501 of using these strains as our natural population.. Firstly, these samples were all collected at the  
502 same time for the same project (35). Further, we know that rates of migration between  
503 populations scales with geographic distance, most of the sequence diversity within the species  
504 is contained in local population (93), and there is evidence for fine-scale genetic structure in  
505 micro-scale populations (95).

506

507 We downloaded raw sequence data for each strain from the European Nucleotide Archive  
508 (accession number PRJEB43128). The full list of strains can be found in Supplementary Table  
509 S1.

510

511

**Supplementary Table 1: List of strains used**

| Strain ID | Location                           | Assembly        |
|-----------|------------------------------------|-----------------|
| NRS6096   | Tayport (UK) garden soil           | GCA_905311035.1 |
| NRS6099   | Tayport (UK) garden soil           | GCA_905310985.1 |
| NRS6103   | Tayport (UK) community garden soil | GCA_905310995.1 |
| NRS6105   | Tayport (UK) community garden soil | GCA_905311425.1 |
| NRS6107   | Tayport (UK) garden soil           | GCA_905311405.1 |
| NRS6108   | Tayport (UK) garden soil           | GCA_905311395.1 |
| NRS6110   | Tayport (UK) vegetable plot        | GCA_905311415.1 |
| NRS6111   | Tayport (UK) vegetable plot        | GCA_905311375.1 |
| NRS6116   | Tayport (UK) garden soil           | GCA_905311385.1 |
| NRS6118   | Tayport (UK) potato patch          | GCA_905311435.1 |
| NRS6120   | Tayport (UK) potato patch          | GCA_905312035.1 |
| NRS6121   | Tayport (UK) shrub bed             | GCA_905315035.1 |
| NRS6127   | Tayport (UK) garden soil           | GCA_905315045.1 |
| NRS6128   | Tayport (UK) garden soil           | GCA_905315055.1 |
| NRS6131   | Tayport (UK) worm bin              | GCA_905315025.1 |
| NRS6134   | Tayport (UK) vegetable patch       | GCA_905315395.1 |
| NRS6137   | Tayport (UK) community garden soil | GCA_905315385.1 |
| NRS6141   | Tayport (UK) garden soil           | GCA_905315375.1 |
| NRS6145   | Tayport (UK) garden soil           | GCA_905315685.1 |
| NRS6148   | Tayport (UK) garden soil           | GCA_905315695.1 |
| NRS6153   | Tayport (UK) garden soil           | GCA_905315705.1 |
| NRS6160   | Tayport (UK) garden soil           | GCA_905315715.1 |
| NRS6167   | Tayport (UK) soil from planter     | GCA_905316385.1 |

|         |                             |                 |
|---------|-----------------------------|-----------------|
| NRS6181 | Tayport (UK) garden soil    | GCA_905318255.1 |
| NRS6183 | Lochee (UK) garden soil     | GCA_905319155.1 |
| NRS6186 | Newport (UK) garden soil    | GCA_905319135.1 |
| NRS6190 | Tayport (UK) garden soil    | GCA_905319565.1 |
| NRS6194 | Tayport (UK) garden soil    | GCA_905319555.1 |
| NRS6202 | Kirriemuir (UK) garden soil | GCA_905319535.1 |
| NRS6205 | Kirriemuir (UK) garden soil | GCA_905319825.1 |
| NRS6206 | Kirriemuir (UK) garden soil | GCA_905319815.1 |

512

### 513 *Genes regulated by quorum sensing*

514

515 For our set of quorum sensing controlled genes, we combine three published datasets: (1) 88  
 516 genes controlled by ComXAP (40); (2) 114 genes controlled by degU (96); (3) 40 genes  
 517 controlled by Spo0A (63).. We didn't use a fourth possible dataset, of 166 genes affected by  
 518 the competence transcription factor ComK, which are indirectly regulated by ComA (97).. This  
 519 is partly because our undomesticated reference strain (NCIB 3610) carries a plasmid-encoded  
 520 protein which interferes with the competence machinery (98) (Supplement S7.). In addition,  
 521 we wanted to focus on the quorum sensing systems known to produce public goods (Figure 3  
 522 of (34)).

523

### 524 *Identifying social genes*

525

526 We used an artisan approach to identify social genes based on laboratory studies which have  
 527 demonstrated that a trait is cooperative. The gold-standard test for a cooperative gene involves  
 528 a wildtype strain which produces the traits, and a mutant strain which doesn't. If a trait is  
 529 cooperative, then the producer will outperform the non-producer when each is grown clonally,  
 530 but non-producers will outperform producers in groups (2). As an example, we look at the first  
 531 gene on the list, *bslA* (formely known as *yuaB*), which is involved in biofilm formation, and  
 532 specifically in making the biofilm hydrophobic to resist chemical attack (99). A non-producer  
 533 of *bslA* cannot form normal biofilms on its own, but can get into mature biofilms when in co-  
 534 culture with producers (100). Further work mixing producers and non-producers at a range of  
 535 starting ratios demonstrated that the biofilm can maintain function as long as >50% of cells are  
 536 producers (99).

537

538 The full list of cooperative genes can be found in Supplementary Table 2.

539

### 540 **Supplementary Table 2: List of social genes**

| Gene               | Function                                            | Reference       |
|--------------------|-----------------------------------------------------|-----------------|
| <b><i>bslA</i></b> | biofilm-surface layer protein BslA                  | Arnaouteli 2020 |
| <b><i>bslB</i></b> | biofilm-surface layer protein BslB                  | Morris 2017     |
| <b><i>epsA</i></b> | hypothetical protein                                | Arnaouteli 2020 |
| <b><i>epsB</i></b> | protein tyrosine kinase EpsB                        | Arnaouteli 2020 |
| <b><i>epsC</i></b> | polysaccharide biosynthesis protein                 | Arnaouteli 2020 |
| <b><i>epsD</i></b> | glycosyltransferase family 4 protein                | Arnaouteli 2020 |
| <b><i>epsE</i></b> | glycosyltransferase EpsE                            | Arnaouteli 2020 |
| <b><i>epsF</i></b> | glycosyltransferase family 1 protein                | Arnaouteli 2020 |
| <b><i>epsG</i></b> | biofilm exopolysaccharide biosynthesis protein EpsG | Arnaouteli 2020 |

|              |                                                                       |                 |
|--------------|-----------------------------------------------------------------------|-----------------|
| <b>epsH</b>  | glycosyltransferase                                                   | Arnaouteli 2020 |
| <b>epsI</b>  | polysaccharide pyruvyl transferase family protein                     | Arnaouteli 2020 |
| <b>epsJ</b>  | lipoprotein                                                           | Arnaouteli 2020 |
| <b>epsK</b>  | cyclic-di-GMP receptor EpsK                                           | Arnaouteli 2020 |
| <b>epsL</b>  | sugar transferase                                                     | Arnaouteli 2020 |
| <b>epsM</b>  | acetyltransferase                                                     | Arnaouteli 2020 |
| <b>epsN</b>  | aminotransferase class I/II-fold pyridoxal phosphate-dependent enzyme | Arnaouteli 2020 |
| <b>epsO</b>  | polysaccharide pyruvyl transferase family protein                     | Arnaouteli 2020 |
| <b>sipW</b>  | signal peptidase I                                                    | Arnaouteli 2020 |
| <b>srfAA</b> | surfactin non-ribosomal peptide synthetase SrfAA                      | Kalamara 2018   |
| <b>srfAB</b> | surfactin non-ribosomal peptide synthetase SrfAB                      | Kalamara 2018   |
| <b>srfAC</b> | surfactin non-ribosomal peptide synthetase SrfAC                      | Kalamara 2018   |
| <b>srfAD</b> | surfactin biosynthesis thioesterase SrfAD                             | Kalamara 2018   |
| <b>srfT</b>  | MFS transporter                                                       | Kalamara 2018   |
| <b>tapA</b>  | amyloid fiber anchoring/assembly protein TapA                         | Arnaouteli 2020 |
| <b>tasA</b>  | biofilm matrix protein TasA                                           | Arnaouteli 2020 |

541

542 For the robustness check of whether deleterious mutations are over- or under-represented in  
543 cooperative genes, we used the protein localisation tool PSORTb 3.0 (77). We categorize  
544 cooperative genes as those which PSORTb predicts to be extracellular. We also follow  
545 previous studies in removing genes for which PSORTb cannot make a definitive prediction  
546 (78)

547

### 548 *Controlling for conditional expression*

549

550 Conditional expression can lead to the same signatures of relaxed selection as kin selection for  
551 cooperation. We directly examined expression rates for the set of genes regulated by quorum  
552 sensing, using data from (36), who measured gene expression of >4000 genes at 11 timepoints  
553 during biofilm formation.

554

555 For any pair of genes, we can calculate the correlation in gene expression across the 11  
556 timepoints of the biofilm. For the 178 quorum sensing genes in our dataset, there are 15753  
557 unique pairs of genes. The mean pairwise Spearman's correlation in gene expression is 0.302.  
558 To test whether this set of genes is more or less correlated than a randomly chosen set of genes,  
559 we use a bootstrap approach. We take a random set of 178 genes and calculate mean pairwise  
560 correlation in the same way as before. Then we repeat 10000 times. We find that the correlation  
561 in expression of our quorum sensing-controlled genes is higher than in 99.7% of our bootstrap  
562 samples (Supplementary Figure 3), demonstrating that our candidate set of genes is appropriate  
563 for our analysis of signature of selection.

564

### 565 *Other cooperative traits*

566

567 We also examined five other types (groups) of traits, where we could compare genes for  
568 putatively private and cooperative traits, that are likely to be expressed at similar rates (Table  
569 1; Figure 4). Firstly, we used iron-scavenging via siderophores, which is a well-studied  
570 cooperative trait that is important for growth and survival of bacteria (3, 101). Specifically, we  
571 looked at the *B. subtilis* siderophore bacillibactin (65, 66). We classified the genes for

572 biosynthesis bacillibactin as cooperative, and genes for uptake and release of bound  
573 bacillibactin as private (Supplementary Table 3). We classified the genes for biosynthesis  
574 bacillibactin as cooperative, and genes for uptake and release of bound bacillibactin as private  
575 (Supplementary Table 3).

576  
577 Second, we looked at antibiotic resistance genes. There are many mechanisms of antibiotic  
578 resistance, some of which are cooperative. For example, the secretion of beta-lactamases is a  
579 cooperative trait as they detoxify the external environment, providing benefits to the local  
580 population (5, 102). We also classified aminoglycoside resistance as cooperative, as the  
581 modification of the antibiotic detoxifies the local environment (103). For the private genes, we  
582 used the eight ABC transporters that are thought to be involved in multi-drug resistance by  
583 pumping antibiotics outside the cell (69, 104) (Supplementary Table 4).

584  
585 Thirdly, we looked at the range of peptidase proteases produced by *B subtilis*. The functions of  
586 these proteases are broad, covering processing, regulation, and feeding, but we can separate  
587 them in cooperative and private genes by looking at those which are secreted (i.e. are  
588 extracellular) and those which are not secreted (70). The secreted proteases are more likely to  
589 have cooperative fitness effects on other cells, through nutrition, interacting with host immune  
590 systems etc (Supplementary Table 6)..

591  
592 Fourthly, we looked at toxins. For the cooperative genes, we used bacilycin, which is a secreted  
593 antimicrobial peptide that is active against a range of bacteria (105). Because bacilycin can  
594 diffuse through the environment, it likely has cooperative fitness effects on others. *B. subtilis*  
595 also has many toxins which are involved in contact-dependent inhibition, and therefore likely  
596 have private effects on fitness. For the private gene, we used six LXG toxins (75), which are  
597 delivered by a Type VII secretion system. Whilst these toxins can still have cooperative effects  
598 by removing competitors, they are by their nature less cooperative than secreted molecule such  
599 as bacilycin. Both of these sets of genes are under control of the DegS-DegU system  
600 (Supplementary Table 5).

601  
602 Fifthly, we looked at antimicrobials. *B. subtilis* produce a series of antimicrobial molecules,  
603 which vary in which organisms they target, how they act, and how they are secreted. We can  
604 however distinguish between antimicrobials that have a more defensive role in traits such as  
605 predation avoidance, and those which have a more offensive role in competition with other  
606 species. Whilst both of these categories likely have some component of cooperative and private  
607 effects on fitness, the offensive ones will be relatively more cooperative. This is because  
608 defensive molecules have a stronger effect on the individuals producing them (Supplementary  
609 Table 7).

610

### 611 ***Identifying deleterious mutations***

612

613 We used the variant annotation tool SnpEff (106) to look for SNPs that generate deleterious  
614 mutations in our dataset.. Specifically, we annotate two types of mutations; (1) premature stop  
615 codons and (2) frameshift mutations. This gives us a list of genes that have at least one  
616 deleterious mutation. To test if a given set of genes are overrepresented for deleterious  
617 mutations, we use two percentages; (1) the % of genes in the whole genome that are in that set,  
618 and (2) the % of genes with deleterious mutations that are in this set. We compare these values  
619 using a binomial test with the null hypothesis that the number of deleterious mutations in the  
620 gene set is equal to that expected by the frequency of the gene set. For any given gene set, we

621 conduct a further test where we use the total number of deleterious mutations in that set of  
622 genes, rather than just presence/absence of deleterious mutations for that gene.

623

## 624 ***Statistics & Figures***

625

626 We conducted all statistical analysis in R (107).. For the main statistical analysis comparing  
627 molecular population genetic parameters of cooperative and private genes we use one of two  
628 statistical tests, depending on the variable in question. For variables that are normally  
629 distributed, we used an ANOVA to compare the three groups of genes. Because of unequal  
630 sample sizes we used Welch ANOVA which doesn't require equal variance. We used the  
631 Games-Howell post-hoc test, which is similar to Tukey's HSD, but designed for Welch  
632 ANOVA where we don't have to assume equal variance. For variables that aren't normally  
633 distributed, we used the Kruskal-Wallis test, which compares medians. We then used the Dunn  
634 test for post-hoc comparisons of groups.

635

636 All results figures were made using the ggplot2 package in R (108) using colour palettes from  
637 the packages wesanderson ([github.com/karthik/wesanderson](https://github.com/karthik/wesanderson)) and BirdBrewer  
638 (<https://github.com/lauriebelch/BirdBrewer>). Figure 4 illustrating the secondary comparisons  
639 was made using BioRenderFigure 4 illustrating the secondary comparisons was made using  
640 BioRender.

641

## 642 ***Bioinformatics***

643

644 Raw reads for each of the 31 strains were downloaded from the European Bioinformatics  
645 Institute's European Nucleotide Archive (accession number PRJEB43128). We then used a  
646 SNP calling pipeline to find SNPs in each strain compared to the reference NCIB 3610  
647 (accession NZ\_CP020102.1).

648

### 649 *Trimming and quality-control*

650 We used Trimmomatic to remove adapters remove low quality reads, which we did by remove  
651 leading and trailing reads if the quality score was <3 or if average quality in a four-base sliding  
652 window was <20. We manually checked the output of this step using the reports produced by  
653 FastQC (109).

654

### 655 *Mapping*

656 We used BWA (110) to map reads from each strain to the reference strain. We used SAMtools  
657 (111) to convert the mapping files from BAM to SAM, and used Picard tools (112)to remove  
658 PCR duplicates.

659

### 660 *Variant calling*

661 We used BCFtools (113) to call variants on all strains and produce a VCF file that can be read  
662 by R for population genetic analysis.

663

### 664 *Filtering and quality control*

665 We conducted further filtering to remove indels, and filter for mapping quality, read depth, and  
666 strain bias using the default setting of SAMtools vcfutils python script. We then removed all  
667 sites which hadn't been called in at least 80% of strains. We also used the coverageBed tool in  
668 BEDtools (114) to record the percentage of each genes length that had been mapped, in order  
669 to adjust per-site measures to the correct length. After filtering, we had a total of 256,769 SNPs  
670 among the 31 strains.



671  
672  
673  
674  
675  
676  
677  
678  
679  
680  
681  
682  
683  
684  
685  
686  
687  
688  
689  
690  
691  
692  
693  
694  
695  
696  
697  
698  
699  
700  
701  
702  
703  
704  
705  
706  
707  
708  
709  
710  
711  
712  
713  
714  
715  
716  
717  
718  
719  
720

### *Outgroup*

We used the phylogeny in Kalamara 2019 (the source of these strains) to identify *Bacillus subtilis subsp. spizizenii* str. W23 as an appropriate outgroup (accession NC\_014479.1, raw sequencing data SRR2063059). We used the same variant calling pipeline as above to produce a second VCF which included the SNPs from the outgroup.

### *Population genetic measures*

We used the PopGenome package from R (115) to conduct the main molecular population genetic analysis. All parameters were scaled to the corresponding mapped gene length, and any gene with mapped length <50% of their full length or lacking polymorphism data was removed from the analysis, leaving 3817 genes for the population genetics analysis. Using PopGenome, we calculated Nucleotide polymorphism, Tajima's D, Fu and Li's D\*, the McDonald-Kreitman p-value, Direction of Selection statistic, and neutrality index. We also calculated separate measures for synonymous and non-synonymous sites where appropriate.

To calculate divergence, we measured the rate of protein evolution  $K_a/K_s$  by comparing the reference strain to the outgroup. We did this by creating a pseudo-genome of the outgroup by inserting the relevant SNPs into the reference sequence using the GATK suite of tools (116). This pseudo-genome could then be read by R, and we used the seqinR package (117) to calculate divergence.

## 721 **Supplementary Material**

### 722 **S1: Codon usage**

723

724 In the main text, we showed that the elevated polymorphism in cooperative genes relative to  
725 private genes occurs at both synonymous and non-synonymous sites. This may be due to  
726 selection on synonymous codon usage, which is common across bacteria (118). In general,  
727 some codons may be preferred due to GC or AT preference, tRNA availability, or metabolic  
728 costs (119–122). We investigated whether codon usage differences between cooperative and  
729 private genes can explain the elevated synonymous polymorphism observed in social genes.  
730

731

731 We used the R package ‘sscu’ (strength of selected codon usage), which calculates several  
732 measures of codon usage bias (123).

733

734 For many measures, we compare social genes to a set of highly expressed genes, under the  
735 assumption that highly expressed genes are under the strongest selection to optimize codon  
736 usage. We followed Rocha 2004 (122) in choosing genes that code for ribosomal proteins as  
737 this set. For our social genes, we used the set of genes coding for extracellular proteins (as  
738 determined by PSORTb), as this is a measure that can be systematically applied to the whole  
739 genome (unlike our ‘artisan’ method, which requires manual curation of genes).

740

741 The first measure we calculated is RSCU, relative synonymous codon usage. This gives a  
742 measure of the relative use of each codon, compared to the null expectation that each codon  
743 for an amino acid is used equally (RSCU = 1) (Supplementary Figure S1.1).  
744

745

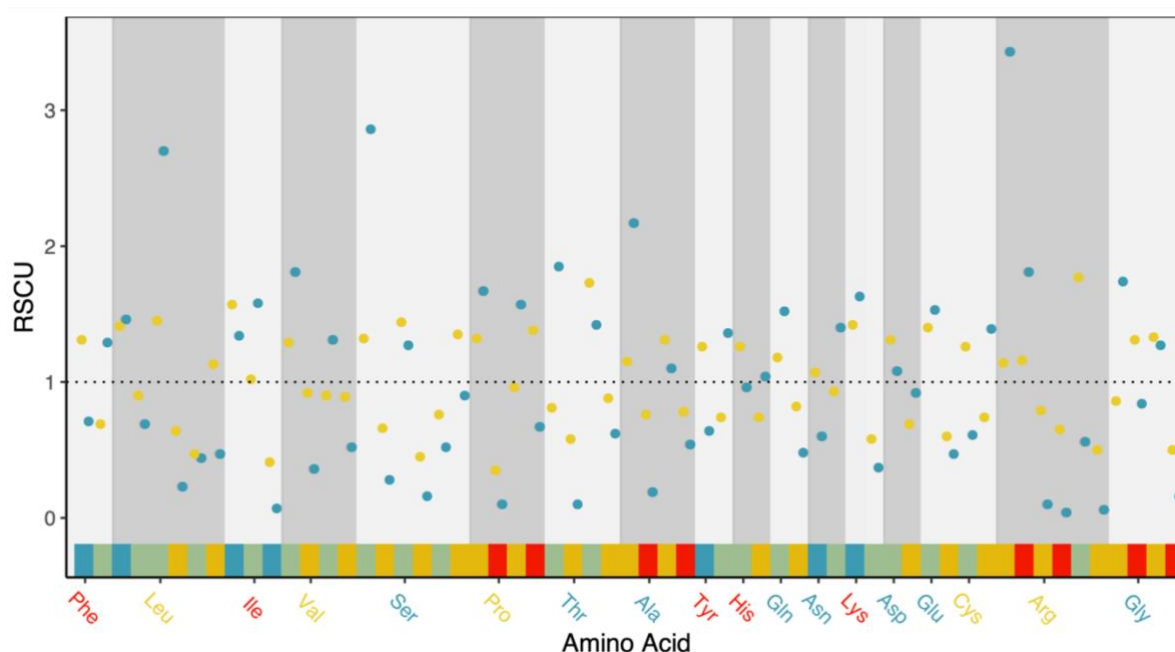

**Supplementary Figure S1.1:** RSCU for cooperative genes (blue) alongside highly expressed (ribosomal) genes (yellow). The dotted line shows RSCU=1, which is when each codon for an amino acid is equally likely to be used. If codons are used at random, we would expect all RSCU values to be close to 1. If certain codons are strongly preferred, then each amino acid should have a codon for which RSCU >> 1

745

746

747 To determine if codon usage is more even in social genes or highly expressed genes, we  
748 calculate Shannon entropy for each amino acid. If each codon is used evenly, then Shannon  
749 entropy will be 0. If one codon is used more frequently than random, then Shannon entropy  
750 will be negative. This is analogous to how entropy is used in ecology to calculate species  
751 richness. An amino acid mostly being coded for with the same codon is equivalent to one  
752 species dominating in a species richness measure.

753

754 On average, Shannon entropy is much less negative for cooperative genes (-0.215 compared to  
755 -0.869 for highly expressed genes), suggesting that cooperative genes have much more even  
756 usage of codons, suggesting that there may be relaxed selection for synonymous codon usage  
757 in cooperative genes (Supplementary Figure S1.2)

758

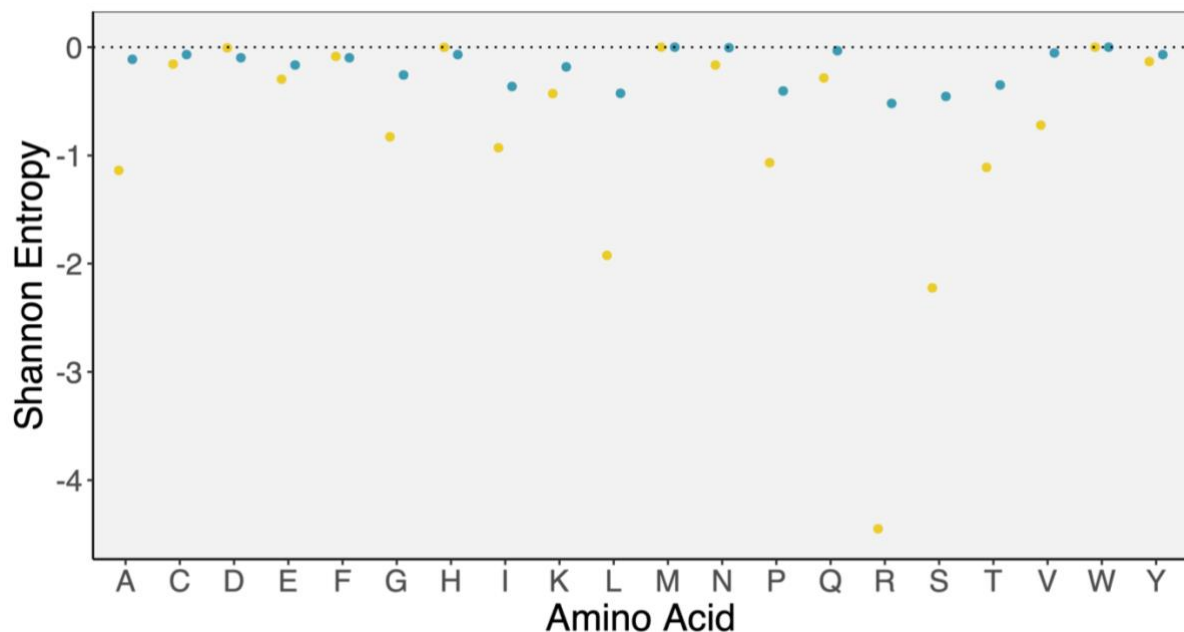

**Supplementary Figure S1.2:** Shannon entropy for cooperative (blue) and highly-expressed (yellow) genes for each amino acid.

759

760

761 Cooperative genes also have higher GC3 (GC content at third positions) than our set of highly  
762 expressed genes. [0.407 in cooperative compared to 0.322 in ribosomal] which may relate to  
763 variable expression.

764

765 The effective number of codons is also substantially higher in cooperative genes than in our set  
766 of highly expressed genes (55.1 compared to 43.4), further demonstrating how cooperative  
767 genes are using more codons, and therefore less likely to use preferred codons. We also  
768 conducted chi-squared tests to determine for each codon whether it was used significantly more  
769 than expected (from random chance) in cooperative genes than highly expressed genes, and  
770 found that only 14 codons are used significantly more often than expected by chance in  
771 cooperative genes, compared to 22 codons that are used significantly more often than expected  
772 for highly-expressed genes.

773

774 Overall, there is some evidence that decreased usage of preferred codons may explain the  
775 increase in synonymous polymorphism. This is the third study to find the counter-intuitive  
776 pattern of increased synonymous polymorphism in social genes (*P. aeruginosa* (28) ; *D.*  
777 *discoideum* (26), so more research is needed in this area.

778 **S2: Cooperative vs. background genes**

779

780 We compared cooperative genes to private genes in the main analysis, and here we also  
781 compare to a set of background genes. For the background genes we use those which produce  
782 proteins that localise to the cytoplasm, as these are least likely to have cooperative functions.  
783 This produces a set of 1832 genes.

784

785 Here, we present the results of the post-hoc comparison between cooperative genes and  
786 background genes for the main set of molecular population genetic measures

787

| Measure                                            | P-value |
|----------------------------------------------------|---------|
| Nucleotide polymorphism                            | 0.004*  |
| Non-synonymous polymorphism                        | 0.006*  |
| Synonymous polymorphism                            | 0.056   |
| Ratio of non-synonymous to synonymous polymorphism | 0.103   |
| Ratio of non-synonymous to synonymous divergence   | 0.017*  |
| Non-synonymous divergence                          | 0.004*  |
| Synonymous divergence                              | 0.485   |
| Tajima's D                                         | 0.220   |
| Neutrality Index                                   | 1.000   |

788

789 We find the same pattern as in the main analysis, with cooperative genes having a signature  
790 of higher non-synonymous polymorphism and divergence, without evidence for increased  
791 likelihood of positive or balancing selection.

792

793 This comparison is less well-controlled than the main analysis, but these results add further  
794 weight to our conclusion that signature of selection we observed in quorum sensing -  
795 controlled genes is a signature of kin selection.

796

797

798

799

800

801

802

803

804

805

806

807

808

809

810

811

812

813

### 814 **S3: Balancing selection**

815

816 A logical explanation for cooperative genes to be more polymorphic than private genes would  
817 be that cooperative genes are more likely to be under balancing selection. This could occur if  
818 both cheats and cooperators are maintained in a population because the fitness advantage of  
819 cheats declines as they become more common (124, 125). It could also occur if multiple  
820 greenbeard recognition alleles are maintained (126).

821

822 To detect balancing selection from sequence alignment data, we can use several population  
823 genetic measures such as Tajima's  $D$  and Fu & Li's  $F^*$  and  $D^*$  that look at allele frequencies  
824 to determine if balancing selection is occurring. Tajima's  $D$  looks at the distribution of allele  
825 frequencies, whereas Fu & Li's measures look at singletons (rare variants found in only one  
826 strain). To interpret these measures, we use statistical tests to determine if each gene is  
827 significantly different from the neutral expectation. We then extract the list of genes with  
828 significant support, and test if they are overrepresented for social genes using binomial tests.

829

830 *Tajima's D*

831

832 We use the beta-distribution test with  $\alpha=0.025$  from the Pegas package in R (127, 128) to  
833 identify which genes have evidence for balancing selection. The test could be significant either  
834 due to balancing selection and a lack of rare alleles ( $D \gg 0$ ) or a recent selective sweep ( $D \ll 0$ ),  
835 so we exclude significant genes where  $D < 0$ .

836

837 We have 242 genes with significant evidence for balancing selection. Only one of those is a  
838 cooperative gene, so cooperative genes are not significant overrepresented in those under  
839 balancing selection (binomial test,  $p=0.380$ ). That gene is the aminoglycoside resistance gene  
840 *aadK*.

841

842 *Fu & Li's  $D^*$  and  $F^*$*

843

844 We use the critical values from (129) for  $n=100$  genes and  $\alpha=0.025$ , which is 1.53 for  $D^*$   
845 and 1.73 for  $F^*$ . The probability of  $D^*$  or  $F^*$  being greater than this critical value for by chance  
846 is 0.025. Although we have  $>100$  genes, this is likely to be a good approximation as the critical  
847 value scales with the natural-log of  $n$ . Although we have  $>100$  genes, this is likely to be a good  
848 approximation as the critical value scales with the natural-log of  $n$ .

849

850 We have 21 genes with significant evidence for balancing selection from Fu & Li's  $D^*$ . None  
851 of them are cooperative. We have 13 genes with significant evidence for balancing selection  
852 from Fu & Li's  $D^*$ . None of them are cooperative

853

854 Overall, these results support our conclusions that cooperative genes have higher  
855 polymorphism due to relaxed selection, rather than balancing selection.

856

857

858

859

860

861

862

863

#### 864 **S4: Positive selection**

865

866 Cooperative genes might show greater divergence than private genes due to being more likely  
867 to be under positive or directional selection.

868

869 We use several complementary measures to look for signatures of positive selection in our  
870 genes. First, we use the McDonald-Kreitman (MK) test, which compares the ratio of non-  
871 synonymous to synonymous divergence with the ratio of non-synonymous to synonymous  
872 polymorphism (130). If there is lots more non-synonymous divergence than non-synonymous  
873 polymorphism, then this could indicate positive selection. The logic is that with strong positive  
874 selection, advantageous mutations don't spend much time as polymorphisms, and are mainly  
875 detected through divergence. .

876

877 We have 15 genes which have evidence for significant positive selection from the MK test.

878 None of them are cooperative.

879

880 Secondly, we use the neutrality index, which uses the same information as the MK test, but  
881 rather than just a binary significance test, it uses the full information to make a continuous  
882 variable (130).. This can be interpreted by comparing averages and distributions of different  
883 groups of genes. We log-transformed neutrality index to normalise, meaning that positive  
884 values indicate positive selection. There is no difference in neutrality index between  
885 cooperative and private genes, and both also don't differ from the background set of genes  
886 (Kruskal-Wallis test, chi-squared=0.06, df=2, p=0.974) Supplementary Figure 4.1.

887

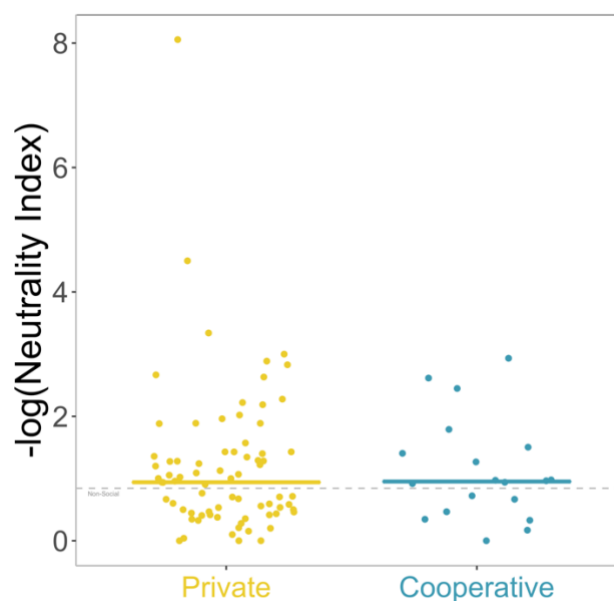

**Supplementary Figure 4.1:** Log-transformed neutrality index of private and cooperative genes. The dashed line shows the median for background genes.

888

889 We also use the direction of selection statistic, which again uses the same information as the  
890 MK test to make a continuous variable, with positive values indicating positive selection.

891 Whilst there is a slight trend for cooperative genes to have a higher direction of selection  
892 statistic than private genes, this is not significant (Kruskal-Wallis test, chi-squared=0.09, df=2,  
893 p=0.955) Supplementary Figure 4.2.

894

895

896

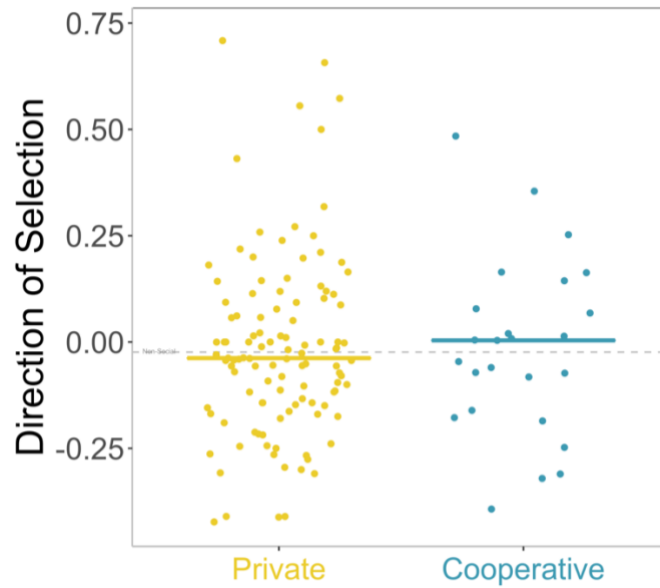

**Supplementary Figure 4.2:** Direction of selection statistic for private and cooperative genes. The dashed line shows the median for background genes.

897

898

Overall, these findings support our conclusion that cooperative genes are not more divergent than private genes due to being more likely to be under positive selection.

899

900

901

902

903

904

905

906

907

908

909

910

911

912

913

914

915

916

917

918

919

920

921

922

923

924

925

926

## 927 **S5: Alternative explanations**

928

### 929 ***Gene length***

930

931 It is well-known that gene length can affect molecular population genetic parameters such as  
932 polymorphism. Even though we calculate all measures per site (considering gene length), we  
933 also check here that our results aren't an artefact of any differences in gene length between  
934 cooperative and private genes.

935

936 Cooperative genes are on average 19% longer than private genes (965 base-pairs compared to  
937 812).

938

939 We conduct a small analysis where we remove the smallest 25% of genes from our analysis,  
940 which is those genes which are <450 base-pairs long.

941

942 Cooperative genes are still significantly more polymorphic and divergent than private genes  
943 using this reduced dataset (Kruskal-Wallis test, chi-squared=8.16, df=2, p=0.017. Dunn Test  
944 p=0.01)

945

### 946 ***Horizontal gene transfer / pangenome***

947

948 We focused our analysis on chromosomal genes, because frequent horizontal gene transfer can  
949 make drawing conclusion from molecular population genetic parameters more challenging. We  
950 check if cooperative genes are more likely to be horizontally transferred by checking if they  
951 are overrepresented in the accessory genome compared to the core genome.

952

953 *B. subtilis* has an open pangenome, meaning that each additional strain sequenced adds many  
954 new genes. This is usually indicative of a species living in multiple or variable environments,  
955 which we know is true for this species. *B. subtilis* is also naturally competent, meaning they  
956 can take-up DNA from the environment, and it is thought that the open pangenome occurs  
957 because rare genes are acquired in this way from closely related species (94).

958

959 We use the panX database (pangenome.org) to assign genes as core or accessory genome based  
960 on 80 *B. subtilis* genomes. If we count core genes as those present in 90% of genomes, then  
961 23.2% of the genes in our reference strain are in the *B. subtilis* accessory genome, and 76.8%  
962 are in the core genome.

963

964 10 out of 53 cooperative genes are in the accessory genome, which is 18.9%. Cooperative genes  
965 are therefore not overrepresented in the accessory genome (binomial test p=0.622).

966

967 We conclude that cooperative genes are not more likely to be transferred horizontally, which  
968 matches with previous results (78)..

969

### 970 **Power analysis**

971

972 We conducted a power analysis to see what would happen if we had fewer strains in our  
973 population genetic analysis.

974

975 We took advantage of the vcf-tools software , which allowed us to randomly remove strains  
976 from our analysis. This enabled us to conduct a basic analysis on polymorphism for a groups



977 of N strains (N = 4,6,8,10,12,14,16,18,20,22,24,26,28), with 22 iterations of each number of  
978 strains

979

980 Within any analysis, we focussed on the 3570 genes which are present in all strains, and  
981 calculated mean and median polymorphism (average pairwise polymorphism, relative to gene  
982 length) (Supplementary Figure S5.1).

983

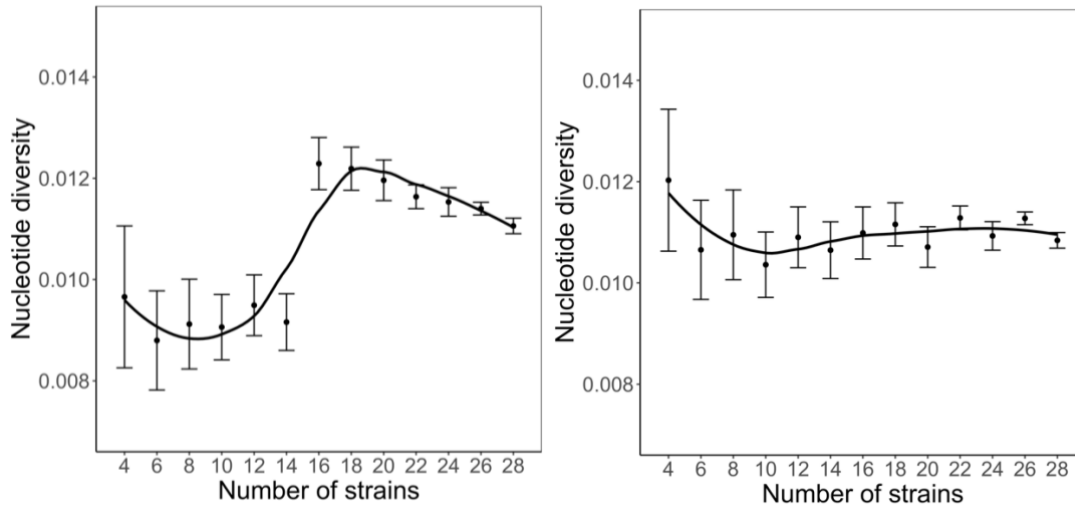

**Supplementary Figure S5.1:** (A) Median polymorphism, (B) Mean polymorphism as the number of strains uses in the analysis varies. The line is a loess regression fit

984

985 The graph on the left shows median polymorphism, which shows a threshold effect once we  
986 get to 16 strains, and also much smaller error bars. This shows that a smaller number of strains  
987 will miss a lot of the diversity between strains.

988

989 The graph on the right shows mean polymorphism. The main pattern is that the standard error  
990 in mean polymorphism declines substantially as the number of strains increase. This means  
991 that the likelihood of getting a good estimate of the population mean increases as the number  
992 of strain increases, which makes logical sense.

993

994 The fact that mean polymorphism doesn't change much, but median does, implies that the  
995 distribution has changed. The overall conclusion is that the number of strains we have included  
996 is likely appropriate to capture the true variation in the population

997

998

999

1000

1001

1002

1003

1004

1005

1006

1007

1008

1009

## 1010 **S6: Division of labour**

1011

1012 We conducted an analysis to see if the division of labour in the production of public goods in  
1013 *B. subtilis* could explain the signatures of selection that we observe. For this, we look at the  
1014 subset of 40 genes which are controlled by Spo0A, which is active only in a subset of cells  
1015 (63). Depending on whether Spo0A is on or off, the expression of extracellular polysaccharides  
1016 and amyloid protein fibres is either repressed or not (32, 61).

1017

1018 Spo0A controlled genes have lower median polymorphism than other quorum sensing -  
1019 controlled genes, whether measured as overall polymorphism (0.0045 vs. 0.0101), non-  
1020 synonymous polymorphism (0.0015 vs. 0.0037), or synonymous polymorphism (0.016 vs.  
1021 0.021).

1022

1023 Spo0A controlled genes also have lower non-synonymous divergence (0.013 vs. 0.023) and  
1024 lower ratio between non-synonymous and synonymous divergence (0.049 vs. 0.097), although  
1025 they have slightly higher synonymous divergence (0.286 vs. 0.266).

1026

1027 The direction of selection statistic is very similar between the two groups (-0.044 vs. -0.037).

1028

1029 This pattern is the opposite to what we would expect if the division of labour was responsible  
1030 for the signature of selection, rather than sociality *per se*. If the lower conditional expression  
1031 was having a large effect, then we would expect these genes to have higher polymorphism than  
1032 the background set of quorum sensing-controlled genes.

1033

1034 Further, EPS and TasA genes stand out within this class of genes as having high polymorphism,  
1035 implying that the social effect is important in causing the signature of selection that we observe.

1036

1037

1038

1039

1040

1041

1042

1043

1044

1045

1046

1047

1048

1049

1050

1051

1052

1053

1054

1055

1056

1057

1058

1059

1060 **S7: Competence**

1061

1062 The reference strain NCIB 3610 has a plasmid-encoded gene ComI, which interferes with the  
1063 competence machinery (Konkol 2013). We know that there is variation in natural competence  
1064 in our strains, as they were all screened for competency by (35). 18 out of the 31 strains we  
1065 used are genetically competent.

1066

1067 Some of the competence genes (comGF, comGE, comGG) have extremely high polymorphism.  
1068 Here, we conduct a small analysis where we restrict our analysis to only competent strains, to  
1069 see if this polymorphism is caused by disuse in non-competent strains. We find that the  
1070 competence operon comG is still amongst the most polymorphic even when we are only  
1071 looking at competent strains.

1072

1073 Furthermore, cooperative genes are still significantly more polymorphic than private genes in  
1074 the competent strains (Kruskal-Wallis test, chi-squared=14.7, df=2, p<0.0001).

1075

1076 Overall, we conclude that variation in natural competence isn't responsible for the difference  
1077 between cooperative and private genes that we observe.

1078

1079

1080

1081

1082

1083

1084

1085

1086

1087

1088

1089

1090

1091

1092

1093

1094

1095

1096

1097

1098

1099

1100

1101

1102

1103

1104

1105

1106

1107

1108

1109 **S8: Estimation of relatedness**

1110

1111 According to theory, the degree to which selection is relaxed in cooperative genes relative to  
1112 private genes is inversely proportional to relatedness. This result emerges from a simple  
1113 population genetics model, which shows that a slightly deleterious allele with a cooperative  
1114 effect on fitness will reach equilibrium frequency inversely proportional to the relationship  
1115 between the actor and recipient ( $r$ ) (19). If we assume weak selection and a large population  
1116 (and ignore higher-order terms), we can directly map this prediction to relative levels of  
1117 nucleotide polymorphism between alleles with cooperative and private effects on fitness.

1118

1119 As we noted in our previous work on *P. aeruginosa*, we have to make further assumptions that  
1120 our set of cooperative genes experience the same average strength of selection and distribution  
1121 of fitness effects as private genes, but this approach has the advantage of many experimental  
1122 attempts to estimate relatedness for social interactions in that we don't need to know the scale  
1123 at which interactions take place, or the relative weighting of environments in which traits are  
1124 more or less social.

1125

1126 Cooperative genes have a median polymorphism of 0.01078, and private genes have median  
1127 polymorphism of 0.00918. This leads to a calculation of relatedness as  $r=0.77$ .

1128

1129 We note that this measure might vary depending on how you define the population, which is  
1130 tricky in bacteria due to horizontal gene transfer and other complications (131). In *B. subtilis*,  
1131 for example, we know that strains from the same plant root or gram of soil can vary in their  
1132 production of public goods, and don't always group together phylogenies (132–134).

1133

1134

1135

1136

1137

1138

1139

1140

1141

1142

1143

1144

1145

1146

1147

1148

1149

1150

1151

1152

1153

1154

1155

1156

1157

1158

1159 **S9: Correlation in gene expression for secondary comparisons**

1160

1161 Here, we use the dataset from Futo *et al.* 2020 to test if the genes we used in the secondary  
1162 comparisons also tend to be co-expressed. For each set of genes we first calculate the mean  
1163 pairwise correlation between all possible pairs of genes. We then use a bootstrap approach of  
1164 randomly sampling 10,000 other gene sets of the same size, to see if the gene set has higher  
1165 correlated expression than expected by chance.

1166

1167 For all gene sets, we find that the correlation is greater than >95% of randomly sampled  
1168 gene-sets (Supplementary Table S9.1)

1169

1170 **Supplementary Table S9.1:** Results from pairwise correlation in gene expression of a gene  
1171 set, and bootstrap iterations of randomly sampled gene sets of the same size

| Gene set              | Correlation for gene set | Mean correlation for 10,000 iterations | Percentile of gene set |
|-----------------------|--------------------------|----------------------------------------|------------------------|
| Iron scavenging       | 0.880                    | 0.329                                  | 100                    |
| Antibiotic resistance | 0.429                    | 0.306                                  | 95.7                   |
| Proteases             | 0.397                    | 0.293                                  | 95.3                   |
| Toxins                | 0.534                    | 0.305                                  | 99.8                   |
| Antimicrobials        | 0.640                    | 0.294                                  | 100                    |

1172

1173

1174

1175

1176

1177

1178

1179

1180

1181

1182

1183

1184

1185

1186

1187

1188

1189

1190

1191

1192

1193

1194

1195

1196

1197

1198

1199

1200

1201

1202 **S10: Positive and balancing selection in other cooperative traits**

1203

1204 We checked whether the other cooperative traits that we examined differ in signatures of  
1205 positive and balancing selection, as this could cloud our conclusion on the nature of selection.  
1206 We use Tajima's D to detect balancing selection, and neutrality index to detect positive  
1207 selection.

1208

1209 Cooperative genes don't differ in balancing selection, whether we use all genes from the six  
1210 comparisons (ANOVA  $F_{2,121} = 7.50, p < 0.001$ ; Games Howell Test  $p=0.39$ ), just the five  
1211 secondary comparisons (ANOVA  $F_{2,44} = 4.72, p = 0.14$ ; Games Howell Test  $p=0.33$ ), or  
1212 consider each gene as a data point (Wilcoxon signed-rank test  $V=7, p=0.563$ ).

1213

1214 Cooperative genes also don't differ in positive selection, whether we use all genes from the six  
1215 comparisons (Kruskal-Wallis  $X^2(2) = 2.11, p = 0.35$ , Dunn Test  $p = 0.70$ ), just the five  
1216 secondary comparisons (Kruskal-Wallis  $X^2(2) = 5.37, p = 0.07$ , Dunn Test  $p = 0.98$ ), or consider  
1217 each gene as a data point (Wilcoxon signed-rank test  $V=7, p=0.563$ ).

1218

1219 Overall, we can conclude that the signature of selection we see across the five other cooperative  
1220 traits are most consistent with kin selection causing the effective relaxation of selection

1221

1222

1223

1224

1225

1226

1227

1228

1229

1230

1231

1232

1233

1234

1235

1236

1237

1238

1239

1240

1241

1242

1243

1244

1245

1246

1247

1248

1249

1250

1251

## 1252 **S11: Correlations in gene expression of QS-controlled genes**

1253

1254 To test the robustness of our result that quorum sensing-controlled genes tend to be expressed  
1255 at the same time, we repeated our analysis using the dataset from Pisithkul (37).

1256

1257 Whilst Futo *et al.* measured gene expression in a solid-air interface biofilm over two months  
1258 (N=11 timepoints), Pisithkul *et al.* used a liquid-air interface, and measured gene expression  
1259 over 24 hours (N=7 timepoints), representing the initial stages of biofilm growth.

1260

1261 Pisithkul *et al.* provided their data in the form of reads per kilobase of transcript per million  
1262 mapped reads. For each gene, we normalised the data with the following steps;

1263

1264 1) We calculated median expression across the four replicates of each timepoint

1265 2) We then divided each measure by the median expression at timepoint one (eight  
1266 hours). This allows for better comparison between genes

1267 3) We then used a log<sub>2</sub> transformation to normalize the resulting relative expression  
1268 measures

1269

1270 The average correlation for the N=160 quorum sensing controlled genes that we were able to  
1271 match to the data was 0.411. The average correlation for N=10,000 randomly sampled gene  
1272 sets of the same size (N=160) was 0.385. Quorum sensing-controlled genes have a higher  
1273 correlation than 98.5% of the randomly sampled gene sets.

1274

1275

1276

1277

1278

1279

1280

1281

1282

1283

1284

1285

1286

1287

1288

1289

1290

1291

1292

1293

1294

1295

1296

1297

1298

1299

1300

1301

1302 **Supplementary Figures**

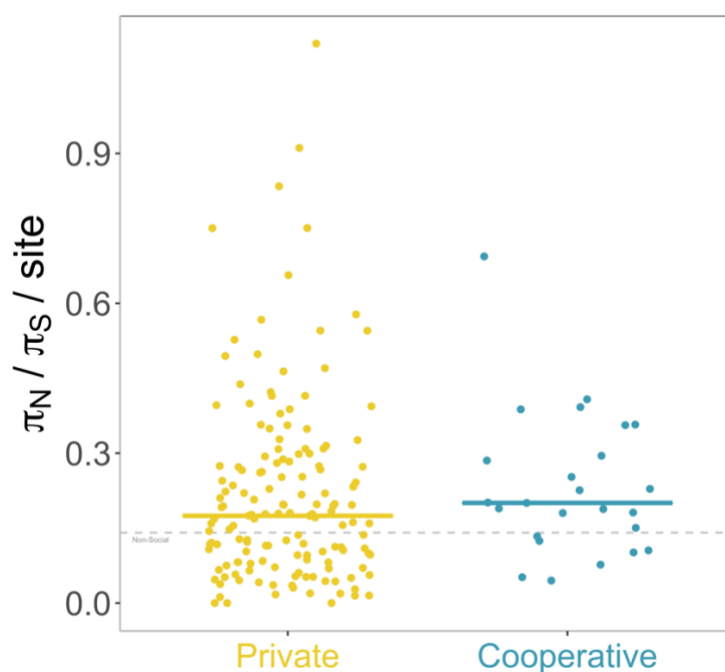

**Supplementary Figure 1:** Ratio between non-synonymous and synonymous nucleotide diversity per site for private (yellow) and cooperative (blue) genes controlled by quorum sensing. Each point is a gene, and the horizontal line shows the median for each group. The grey line shows the median for background private genes across the genome.

1303

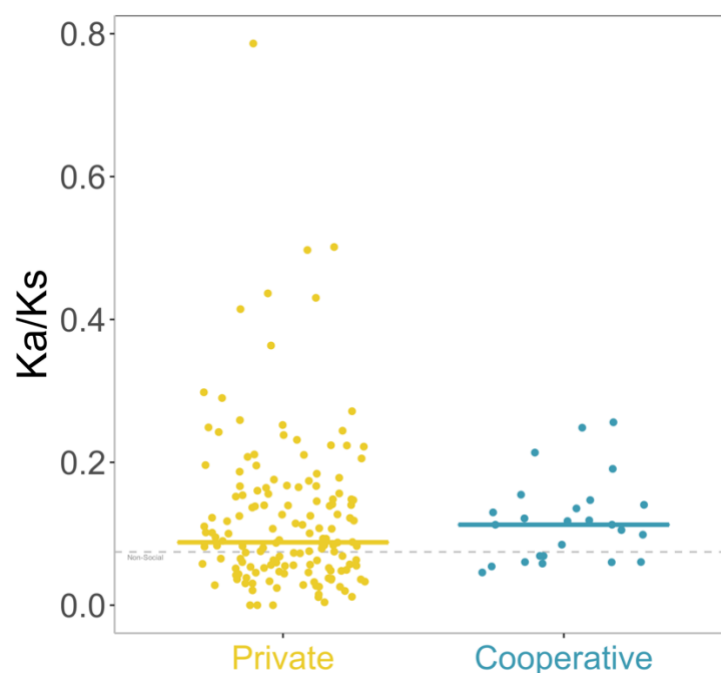

**Supplementary Figure 2:** Ratio between non-synonymous and synonymous divergence for private (yellow) and cooperative (blue) genes controlled by quorum sensing. Divergence is measured by rates of protein evolution, e.g. number of synonymous substitutions per synonymous site for panel B. Each point is a gene, and the horizontal line shows the median for each group. The grey line shows the median for background private genes across the genome.



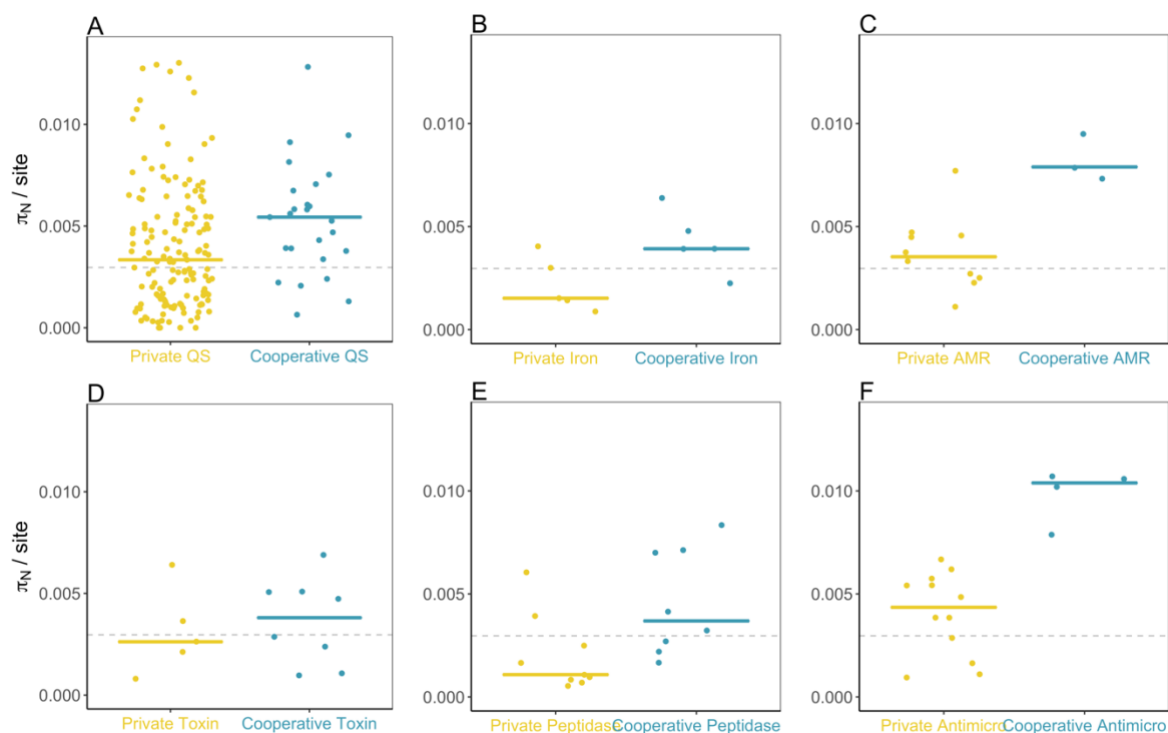

**Supplementary Figure 3:** Private (yellow) vs. cooperative (blue) non-synonymous polymorphism in genes for six traits. Panel A shows the quorum sensing -controlled genes used in the main analysis. Panels B-F show the secondary comparisons

1304

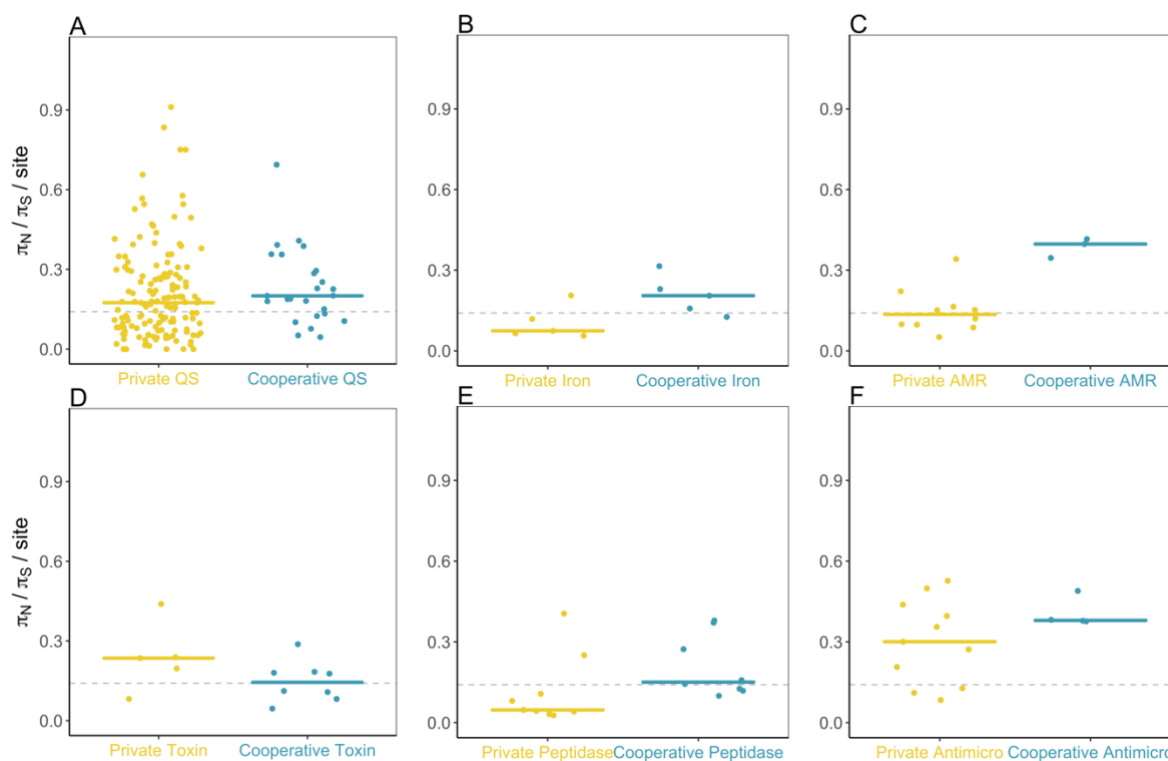

**Supplementary Figure 4:** Private (yellow) vs. cooperative (blue) ratio between non-synonymous and synonymous polymorphism in genes for six traits. Panel A shows the quorum sensing-controlled genes used in the main analysis. Panels B-F show the secondary comparisons

1305

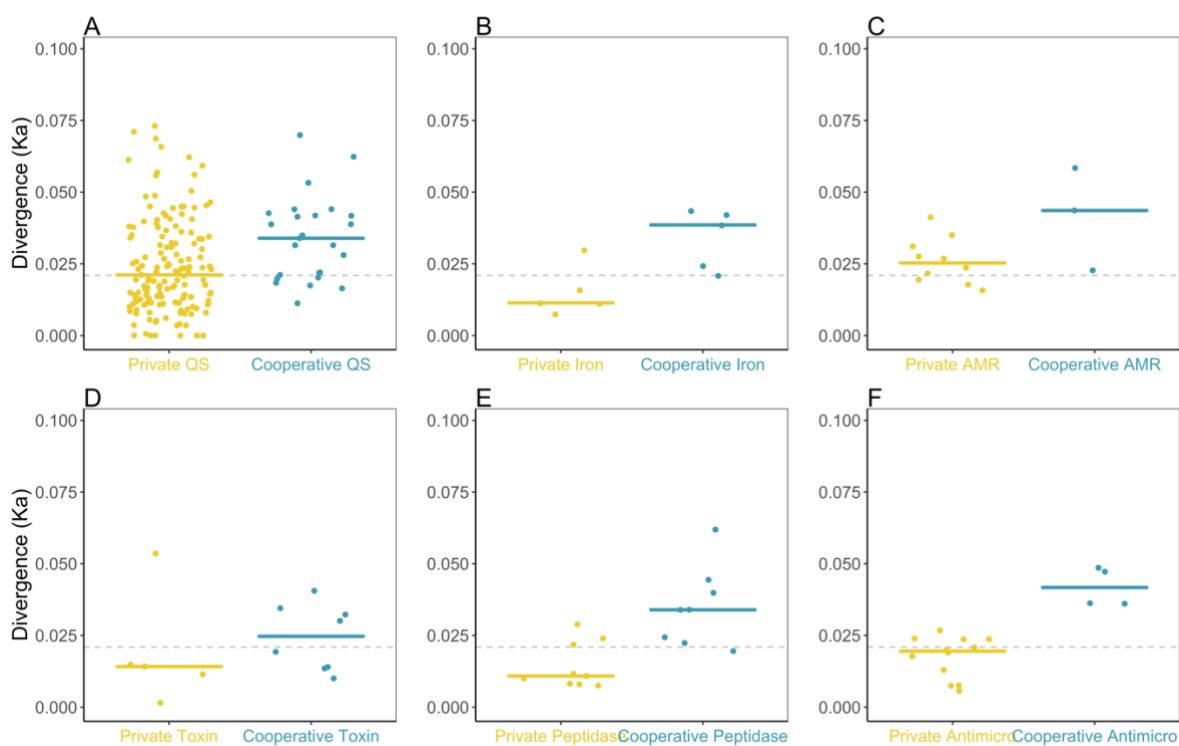

**Supplementary Figure 5:** Private (yellow) vs. cooperative (blue) non-synonymous divergence in genes for six traits. Panel A shows the quorum sensing -controlled genes used in the main analysis. Panels B-F show the secondary comparisons

1306

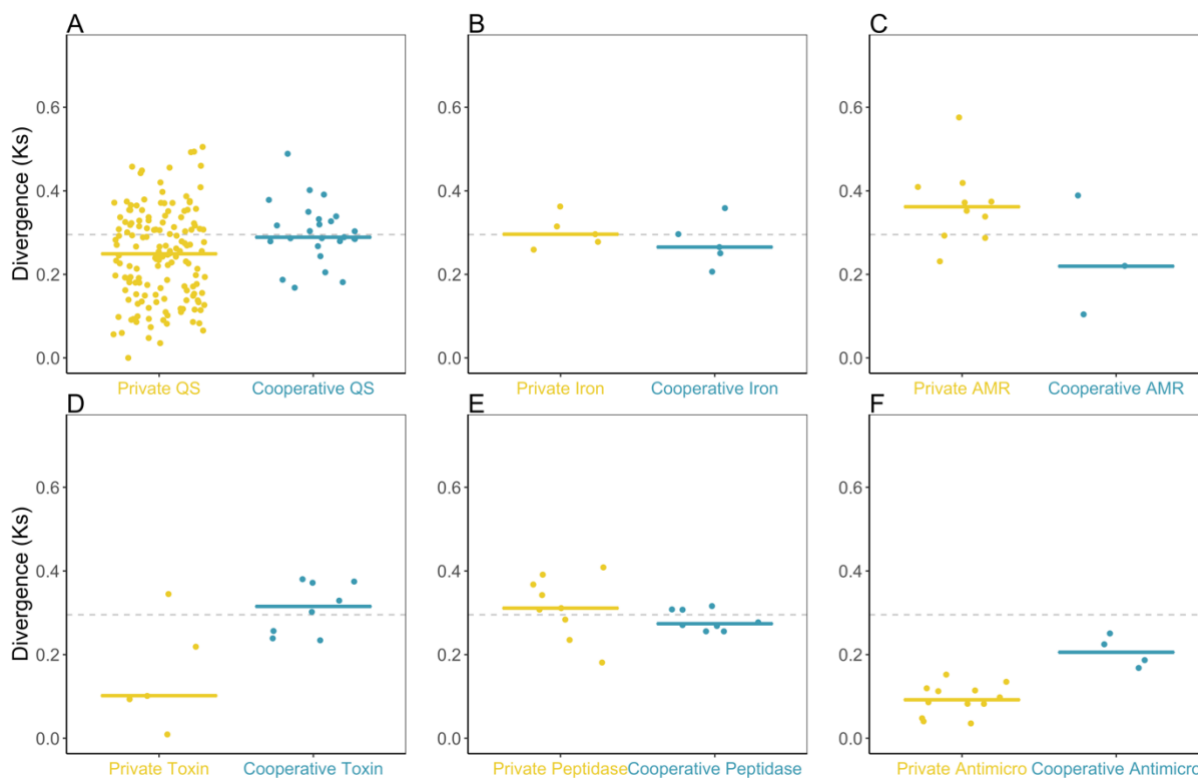

**Supplementary Figure 6:** Private (yellow) vs. cooperative (blue) synonymous divergence in genes for six traits. Panel A shows the quorum sensing -controlled genes used in the main analysis. Panels B-F show the secondary comparisons

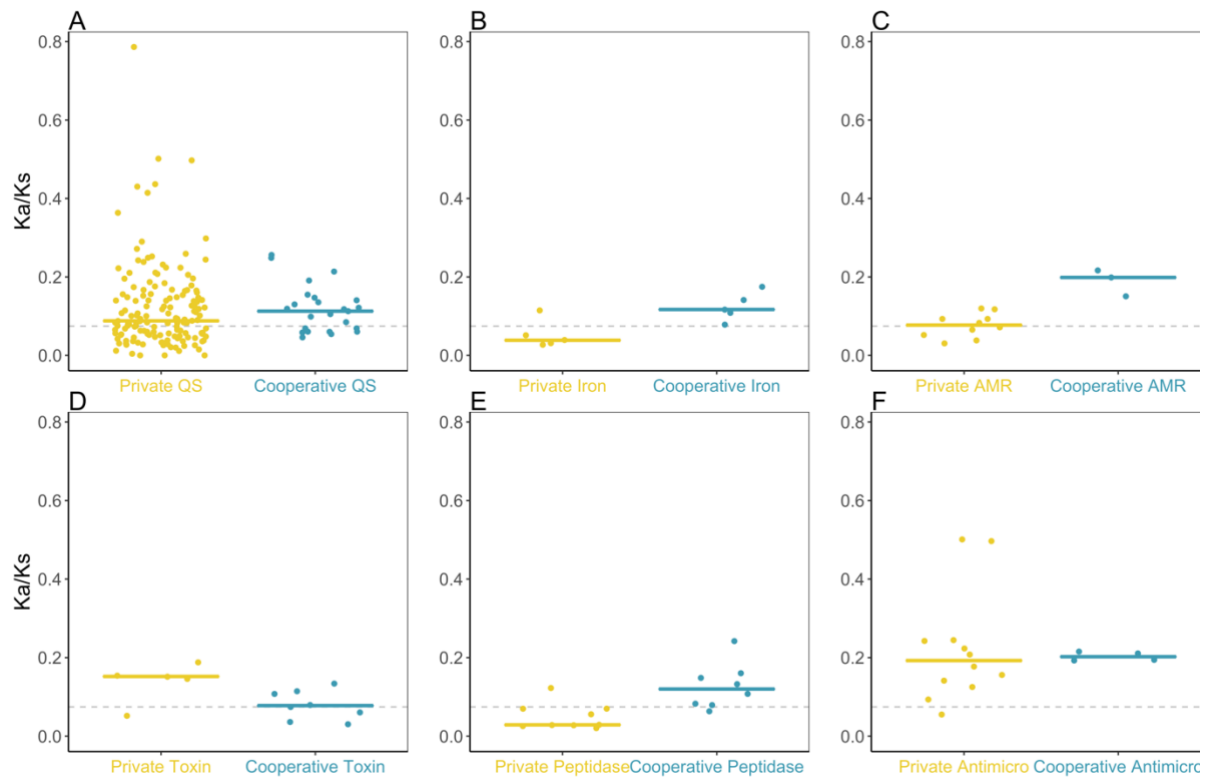

**Supplementary Figure 7:** Private (yellow) vs. cooperative (blue) ratio between non-synonymous and synonymous divergence in genes for six traits. Panel A shows the quorum sensing-controlled genes used in the main analysis. Panels B-F show the secondary comparisons

1307  
1308  
1309  
1310  
1311  
1312  
1313  
1314  
1315  
1316  
1317  
1318  
1319  
1320  
1321  
1322  
1323  
1324  
1325  
1326  
1327

1328 **Supplementary Tables**

1329 **Supplementary Table 1: List of strains used**

| Strain ID | Location                           | Assembly        |
|-----------|------------------------------------|-----------------|
| NRS6096   | Tayport (UK) garden soil           | GCA_905311035.1 |
| NRS6099   | Tayport (UK) garden soil           | GCA_905310985.1 |
| NRS6103   | Tayport (UK) community garden soil | GCA_905310995.1 |
| NRS6105   | Tayport (UK) community garden soil | GCA_905311425.1 |
| NRS6107   | Tayport (UK) garden soil           | GCA_905311405.1 |
| NRS6108   | Tayport (UK) garden soil           | GCA_905311395.1 |
| NRS6110   | Tayport (UK) vegetable plot        | GCA_905311415.1 |
| NRS6111   | Tayport (UK) vegetable plot        | GCA_905311375.1 |
| NRS6116   | Tayport (UK) garden soil           | GCA_905311385.1 |
| NRS6118   | Tayport (UK) potato patch          | GCA_905311435.1 |
| NRS6120   | Tayport (UK) potato patch          | GCA_905312035.1 |
| NRS6121   | Tayport (UK) shrub bed             | GCA_905315035.1 |
| NRS6127   | Tayport (UK) garden soil           | GCA_905315045.1 |
| NRS6128   | Tayport (UK) garden soil           | GCA_905315055.1 |
| NRS6131   | Tayport (UK) worm bin              | GCA_905315025.1 |
| NRS6134   | Tayport (UK) vegetable patch       | GCA_905315395.1 |
| NRS6137   | Tayport (UK) community garden soil | GCA_905315385.1 |
| NRS6141   | Tayport (UK) garden soil           | GCA_905315375.1 |
| NRS6145   | Tayport (UK) garden soil           | GCA_905315685.1 |
| NRS6148   | Tayport (UK) garden soil           | GCA_905315695.1 |
| NRS6153   | Tayport (UK) garden soil           | GCA_905315705.1 |
| NRS6160   | Tayport (UK) garden soil           | GCA_905315715.1 |
| NRS6167   | Tayport (UK) soil from planter     | GCA_905316385.1 |
| NRS6181   | Tayport (UK) garden soil           | GCA_905318255.1 |
| NRS6183   | Lochee (UK) garden soil            | GCA_905319155.1 |
| NRS6186   | Newport (UK) garden soil           | GCA_905319135.1 |
| NRS6190   | Tayport (UK) garden soil           | GCA_905319565.1 |
| NRS6194   | Tayport (UK) garden soil           | GCA_905319555.1 |
| NRS6202   | Kirriemuir (UK) garden soil        | GCA_905319535.1 |
| NRS6205   | Kirriemuir (UK) garden soil        | GCA_905319825.1 |
| NRS6206   | Kirriemuir (UK) garden soil        | GCA_905319815.1 |

1330  
1331  
1332  
1333  
1334  
1335  
1336  
1337  
1338

1339

**Supplementary Table 2: List of social genes**

| Gene         | Function                                                              | Reference |
|--------------|-----------------------------------------------------------------------|-----------|
| <b>bslA</b>  | biofilm-surface layer protein BslA                                    | (33, 34)  |
| <b>bslB</b>  | biofilm-surface layer protein BslB                                    | (135)     |
| <b>epsA</b>  | hypothetical protein                                                  | (33, 34)  |
| <b>epsB</b>  | protein tyrosine kinase EpsB                                          | (33, 34)  |
| <b>epsC</b>  | polysaccharide biosynthesis protein                                   | (33, 34)  |
| <b>epsD</b>  | glycosyltransferase family 4 protein                                  | (33, 34)  |
| <b>epsE</b>  | glycosyltransferase EpsE                                              | (33, 34)  |
| <b>epsF</b>  | glycosyltransferase family 1 protein                                  | (33, 34)  |
| <b>epsG</b>  | biofilm exopolysaccharide biosynthesis protein EpsG                   | (33, 34)  |
| <b>epsH</b>  | glycosyltransferase                                                   | (33, 34)  |
| <b>epsI</b>  | polysaccharide pyruvyl transferase family protein                     | (33, 34)  |
| <b>epsJ</b>  | lipoprotein                                                           | (33, 34)  |
| <b>epsK</b>  | cyclic-di-GMP receptor EpsK                                           | (33, 34)  |
| <b>epsL</b>  | sugar transferase                                                     | (33, 34)  |
| <b>epsM</b>  | acetyltransferase                                                     | (33, 34)  |
| <b>epsN</b>  | aminotransferase class I/II-fold pyridoxal phosphate-dependent enzyme | (33, 34)  |
| <b>epsO</b>  | polysaccharide pyruvyl transferase family protein                     | (33, 34)  |
| <b>sipW</b>  | signal peptidase I                                                    | (33, 34)  |
| <b>srfAA</b> | surfactin non-ribosomal peptide synthetase SrfAA                      | (33, 34)  |
| <b>srfAB</b> | surfactin non-ribosomal peptide synthetase SrfAB                      | (33, 34)  |
| <b>srfAC</b> | surfactin non-ribosomal peptide synthetase SrfAC                      | (33, 34)  |
| <b>srfAD</b> | surfactin biosynthesis thioesterase SrfAD                             | (33, 34)  |
| <b>srfT</b>  | MFS transporter                                                       | (33, 34)  |
| <b>tapA</b>  | amyloid fiber anchoring/assembly protein TapA                         | (33, 34)  |
| <b>tasA</b>  | biofilm matrix protein TasA                                           | (33, 34)  |

1340 **Supplementary Table 3: Cooperative and private genes for iron-scavenging via bacillibactin**

| Gene ID                | Name        | Function                     | Sociality   | Reference |
|------------------------|-------------|------------------------------|-------------|-----------|
| <b>IRON SCAVENGING</b> |             |                              |             |           |
| <b>17270</b>           | dhbF        | Bacillibactin biosynthesis   | Cooperative | (65, 66)  |
| <b>17275</b>           | dhbB        | Bacillibactin biosynthesis   | Cooperative | (65, 66)  |
| <b>17280</b>           | dhbE        | Bacillibactin biosynthesis   | Cooperative | (65, 66)  |
| <b>17285</b>           | dhbC        | Bacillibactin biosynthesis   | Cooperative | (65, 66)  |
| <b>17290</b>           | dhbA        | Bacillibactin biosynthesis   | Cooperative | (65, 66)  |
| <b>1040</b>            | feuC        | Membrane permease            | Private     | (65, 66)  |
| <b>1045</b>            | feuB        | Membrane permease            | Private     | (65, 66)  |
| <b>1050</b>            | feuA        | Periplasmic binding protein  | Private     | (65, 66)  |
| <b>17785</b>           | yusV [feuV] | ABC transporter              | Private     | (65, 66)  |
| <b>17295</b>           | besA        | Ferri-bacillibactin esterase | Private     | (65, 66)  |

1341

1342 **Supplementary Table 4: Cooperative and private genes for antibiotic resistance**

| Gene ID | Name | Function | Sociality | Reference |
|---------|------|----------|-----------|-----------|
|---------|------|----------|-----------|-----------|

| <b>ANTIBIOTIC RESISTANCE</b> |               |                           |             |      |
|------------------------------|---------------|---------------------------|-------------|------|
| <b>1295</b>                  | blaOXA (ybxI) | Beta-lactamase            | Cooperative | (67) |
| <b>10225</b>                 | bla (penP)    | Beta-lactamase            | Cooperative | (67) |
| <b>14460</b>                 | aadk          | Aminoglycoside resistance | Cooperative | (68) |
| <b>5445</b>                  | bmrC          | Multidrug ABC transporter | Private     | (69) |
| <b>5550</b>                  | bmrD          | Multidrug ABC transporter | Private     | (69) |
| <b>20835</b>                 | cydC          | Multidrug ABC transporter | Private     | (69) |
| <b>20840</b>                 | cydD          | Multidrug ABC transporter | Private     | (69) |
| <b>4595</b>                  | yfiB          | Multidrug ABC transporter | Private     | (69) |
| <b>4600</b>                  | yfiC          | Multidrug ABC transporter | Private     | (69) |
| <b>7900</b>                  | yknU          | Multidrug ABC transporter | Private     | (69) |
| <b>7905</b>                  | yknV          | Multidrug ABC transporter | Private     | (69) |
| <b>20050</b>                 | ywjA          | Multidrug ABC transporter | Private     | (69) |
| <b>18775</b>                 | bmrA          | Multidrug ABC transporter | Private     | (69) |
| <b>4830</b>                  | ygaD          | Multidrug ABC transporter | Private     | (69) |
| <b>11680</b>                 | sunT          | Sublancin transporter     | Private     | (69) |

1343

1344 **Supplementary Table 5:** Cooperative and private genes toxin genes

| <b>Gene ID</b> | <b>Name</b> | <b>Function</b>                 | <b>Sociality</b> | <b>Reference</b> |
|----------------|-------------|---------------------------------|------------------|------------------|
| <b>TOXINS</b>  |             |                                 |                  |                  |
| <b>20325</b>   | ywfA        | Bacilycin biosynthesis & export | Cooperative      | (105)            |
| <b>20320</b>   | bacA        | Bacilycin biosynthesis & export | Cooperative      | (105)            |
| <b>20315</b>   | bacB        | Bacilycin biosynthesis & export | Cooperative      | (105)            |
| <b>20310</b>   | bacC        | Bacilycin biosynthesis & export | Cooperative      | (105)            |
| <b>20305</b>   | bacD        | Bacilycin biosynthesis & export | Cooperative      | (105)            |
| <b>20300</b>   | bacE        | Bacilycin biosynthesis & export | Cooperative      | (105)            |
| <b>20295</b>   | bacF        | Bacilycin biosynthesis & export | Cooperative      | (105)            |
| <b>20290</b>   | bacG        | Bacilycin biosynthesis & export | Cooperative      | (105)            |
| <b>3890</b>    | yeeF        | LXG toxin                       | Private          | (75)             |
| <b>10360</b>   | yobL        | LXG toxin                       | Private          | (75)             |
| <b>11735</b>   | yokI        | LXG toxin                       | Private          | (75)             |
| <b>1830</b>    | yqcG        | LXG toxin                       | Private          | (75)             |
| <b>19495</b>   | ywqJ (rttN) | LXG toxin                       | Private          | (75)             |
| <b>21125</b>   | yxiD        | LXG toxin                       | Private          | (75)             |

1345

1346 **Supplementary Table 6:** Cooperative and private genes protease genes

| <b>Gene ID</b>   | <b>Name</b> | <b>Function</b>        | <b>Sociality</b> | <b>Reference</b> |
|------------------|-------------|------------------------|------------------|------------------|
| <b>PROTEASES</b> |             |                        |                  |                  |
| <b>5755</b>      | aprE        | Extracellular protease | Cooperative      | (70)             |
| <b>8405</b>      | Bpr         | Extracellular protease | Cooperative      | (70)             |
| <b>20660</b>     | Epr         | Extracellular protease | Cooperative      | (70)             |
| <b>1375</b>      | Mpr         | Extracellular protease | Cooperative      | (70)             |
| <b>6155</b>      | nprB        | Extracellular protease | Cooperative      | (70)             |
| <b>8100</b>      | nprE        | Extracellular protease | Cooperative      | (70)             |
| <b>20500</b>     | Upr         | Extracellular protease | Cooperative      | (70)             |
| <b>5990</b>      | wprA        | Extracellular protease | Cooperative      | (70)             |
| <b>9385</b>      | aprX        | Intracellular protease | Private          | (70)             |
| <b>7560</b>      | clpE        | Intracellular protease | Private          | (70)             |
| <b>18630</b>     | clpP        | Intracellular protease | Private          | (70)             |

|              |      |                        |         |      |
|--------------|------|------------------------|---------|------|
| <b>8830</b>  | clpQ | Intracellular protease | Private | (70) |
| <b>13140</b> | ispA | Intracellular protease | Private | (70) |
| <b>15210</b> | lonA | Intracellular protease | Private | (70) |
| <b>15215</b> | lonB | Intracellular protease | Private | (70) |
| <b>9115</b>  | mlpA | Intracellular protease | Private | (70) |
| <b>12000</b> | ypwA | Intracellular protease | Private | (70) |

1347

1348 **Supplementary Table 7:** Cooperative and private genes for the production of antimicrobials

| <b>Gene ID</b>   | <b>Name</b> | <b>Function</b>          | <b>Sociality</b> | <b>Reference</b> |
|------------------|-------------|--------------------------|------------------|------------------|
| <b>PROTEASES</b> |             |                          |                  |                  |
| <b>9975</b>      | ppsA        | Plipistatin biosynthesis | Cooperative      | (73)             |
| <b>9970</b>      | ppsB        | Plipistatin biosynthesis | Cooperative      | (73)             |
| <b>9965</b>      | ppsC        | Plipistatin biosynthesis | Cooperative      | (73)             |
| <b>9960</b>      | ppsD        | Plipistatin biosynthesis | Cooperative      | (73)             |
| <b>9955</b>      | ppsE        | Plipistatin biosynthesis | Cooperative      | (73)             |
| <b>9295</b>      | pksB        | Bacillaene biosynthesis  | Private          | (74)             |
| <b>9310</b>      | pksD        | Bacillaene biosynthesis  | Private          | (74)             |
| <b>9315</b>      | pksE        | Bacillaene biosynthesis  | Private          | (74)             |
| <b>9325</b>      | pksF        | Bacillaene biosynthesis  | Private          | (74)             |
| <b>9330</b>      | pksG        | Bacillaene biosynthesis  | Private          | (74)             |
| <b>9335</b>      | pksH        | Bacillaene biosynthesis  | Private          | (74)             |
| <b>9340</b>      | pksI        | Bacillaene biosynthesis  | Private          | (74)             |
| <b>9345</b>      | pksJ        | Bacillaene biosynthesis  | Private          | (74)             |
| <b>9350</b>      | pksL        | Bacillaene biosynthesis  | Private          | (74)             |
| <b>9355</b>      | pksM        | Bacillaene biosynthesis  | Private          | (74)             |
| <b>9360</b>      | pksN        | Bacillaene biosynthesis  | Private          | (74)             |
| <b>9365</b>      | pksR        | Bacillaene biosynthesis  | Private          | (74)             |
| <b>9370</b>      | pksS        | Bacillaene biosynthesis  | Private          | (74)             |

1349

1350

1351

1352

1353

1354

1355

1356

1357

1358

1359

1360

1361

1362

1363

1364

1365

1366

1367

1368

1369

1370

## 1371 References

- 1372 1. J. E. Strassmann, O. M. Gilbert, D. C. Queller, Kin discrimination and cooperation in  
1373 microbes. *Annu. Rev. Microbiol.* **65**, 349–367 (2011).
- 1374 2. S. A. West, A. S. Griffin, A. Gardner, S. P. Diggle, Social evolution theory for  
1375 microorganisms. *Nat Rev Microbiol* **4**, 597–607 (2006).
- 1376 3. A. S. Griffin, S. A. West, A. Buckling, Cooperation and competition in pathogenic  
1377 bacteria. *Nature* **430**, 1024–1027 (2004).
- 1378 4. L. McNally, M. Viana, S. P. Brown, Cooperative secretions facilitate host range  
1379 expansion in bacteria. *Nat. Commun.* **5** (2014).
- 1380 5. L. A. Dugatkin, M. Perlin, J. S. Lucas, R. Atlas, Group-beneficial traits, frequency-  
1381 dependent selection and genotypic diversity: An antibiotic resistance paradigm. *Proc.*  
1382 *R. Soc. B Biol. Sci.* **272**, 79–83 (2005).
- 1383 6. M. Ghoul, A. S. Griffin, S. A. West, Toward an evolutionary definition of cheating.  
1384 *Evolution (N. Y.)*. **68**, 318–331 (2014).
- 1385 7. W. D. W. D. Hamilton, The Genetical Evolution of Social Behaviour. II. *J. Theor.*  
1386 *Biol.* **7**, 17–52 (1964).
- 1387 8. R. Kümmerli, A. S. Griffin, S. A. West, A. Buckling, F. Harrison, Viscous medium  
1388 promotes cooperation in the pathogenic bacterium *Pseudomonas aeruginosa*. *Proc. R.*  
1389 *Soc. B Biol. Sci.* **276**, 3531–3538 (2009).
- 1390 9. S. P. Diggle, A. S. Griffin, G. S. Campbell, S. A. West, Cooperation and conflict in  
1391 quorum-sensing bacterial populations. *Nature* **450**, 411–414 (2007).
- 1392 10. J. E. Strassmann, Y. Zhu, D. C. Queller, Altruism and social cheating in the social  
1393 amoeba *Dictyostelium discoideum*. *Nature* **408**, 965–967 (2000).
- 1394 11. G. J. Velicer, L. Kroos, R. E. Lenski, Developmental cheating in the social bacterium  
1395 *Myxococcus xanthus*. *Nature* **404**, 598–601 (2000).
- 1396 12. M. Ghoul, S. B. Andersen, S. A. West, Sociomics: Using Omic Approaches to  
1397 Understand Social Evolution. *Trends Genet.* **33**, 408–419 (2017).
- 1398 13. O. X. Cordero, L. -a. L. A. Ventouras, E. F. DeLong, M. F. Polz, Public good  
1399 dynamics drive evolution of iron acquisition strategies in natural bacterioplankton  
1400 populations. *Proc. Natl. Acad. Sci.* **109**, 20059–20064 (2012).
- 1401 14. E. Butaite, M. Baumgartner, S. Wyder, R. Kümmerli, Siderophore cheating and  
1402 cheating resistance shape competition for iron in soil and freshwater *Pseudomonas*  
1403 communities. *Nat. Commun.* **8**, 414 (2017).
- 1404 15. S. B. Andersen, *et al.*, Long-term social dynamics drive loss of function in pathogenic  
1405 bacteria. *Proc. Natl. Acad. Sci. U. S. A.* **112**, 10756–10761 (2015).
- 1406 16. T. Jautzus, J. van Gestel, Á. T. Kovács, Complex extracellular biology drives surface  
1407 competition during colony expansion in *Bacillus subtilis*. *ISME J.* (2022)  
1408 <https://doi.org/10.1038/s41396-022-01279-8>.
- 1409 17. R. M. Fisher, C. K. Cornwallis, S. A. West, Group formation, relatedness, and the  
1410 evolution of multicellularity. *Curr. Biol.* **23**, 1120–1125 (2013).
- 1411 18. C. Simonet, L. McNally, Kin selection explains the evolution of cooperation in the gut  
1412 microbiota. *Proc. Natl. Acad. Sci.* (2021) <https://doi.org/10.1073/pnas.2016046118>.
- 1413 19. T. A. Linksvayer, M. J. Wade, Genes with social effects are expected to harbor more  
1414 sequence variation within and between species. *Evolution (N. Y.)*. **63**, 1685–1696  
1415 (2009).
- 1416 20. T. A. Linksvayer, M. J. Wade, Theoretical predictions for sociogenomic data: The  
1417 effects of kin selection and sex-limited expression on the evolution of social insect  
1418 genomes. *Front. Ecol. Evol.* **4**, 1–10 (2016).
- 1419 21. J. D. Van Dyken, M. J. Wade, The genetic signature of conditional expression.



- 1420 *Genetics* **184**, 557–570 (2010).
- 1421 22. J. D. van Dyken, M. J. Wade, Detecting the molecular signature of social conflict:  
1422 Theory and a test with bacterial quorum sensing genes. *Am. Nat.* **179**, 436–450 (2012).
- 1423 23. J. D. Van Dyken, T. A. Linksvayer, M. J. Wade, Kin selection-mutation balance: A  
1424 model for the origin, maintenance, and consequences of social cheating. *Am. Nat.* **177**,  
1425 288–300 (2011).
- 1426 24. E. A. Ostrowski, *et al.*, Genomic Signatures of Cooperation and Conflict in the Social  
1427 Amoeba. *Curr. Biol.* **25**, 1661–5 (2015).
- 1428 25. S. Noh, K. S. Geist, X. Tian, J. E. Strassmann, D. C. Queller, Genetic signatures of  
1429 microbial altruism and cheating in social amoebas in the wild. *Proc. Natl. Acad. Sci.*  
1430 *U. S. A.* **115**, 3096–3101 (2018).
- 1431 26. J. L. de Oliveira, *et al.*, Conditional expression explains molecular evolution of social  
1432 genes in a microbe. *Nat. Commun.* **10**, 3284 (2019).
- 1433 27. O. M. Gilbert, K. R. Foster, N. J. Mehdiabadi, J. E. Strassmann, D. C. Queller, High  
1434 relatedness maintains multicellular cooperation in a social amoeba by controlling  
1435 cheater mutants. *Proc. Natl. Acad. Sci.* **104**, 8913–8917 (2007).
- 1436 28. L. J. Belcher, A. E. Dewar, M. Ghoul, S. A. West, Kin selection for cooperation in  
1437 natural bacterial populations. *Proc. Natl. Acad. Sci. U. S. A.* **119** (2022).
- 1438 29. M. W. Hahn, *Molecular Population Genetics* (OUP USA, 2018).
- 1439 30. N. A. Logan, P. De Vos, “Bacillus” in *Bergey’s Manual of Systematics of Archaea and*  
1440 *Bacteria*, F. A. R. and W. B. W. M.E. Trujillo, S. Dedysh, P. DeVos, B. Hedlund, P.  
1441 Kämpfer, Ed. (2015) <https://doi.org/10.1002/9781118960608.gbm00530>.
- 1442 31. J. W. Veening, *et al.*, Bet-hedging and epigenetic inheritance in bacterial cell  
1443 development. *Proc. Natl. Acad. Sci. U. S. A.* **105**, 4393–4398 (2008).
- 1444 32. A. Dragoš, *et al.*, Division of Labor during Biofilm Matrix Production. *Curr. Biol.* **28**,  
1445 1903-1913.e5 (2018).
- 1446 33. S. Arnaouteli, N. C. Bamford, N. R. Stanley-Wall, Á. T. Kovács, *Bacillus subtilis*  
1447 biofilm formation and social interactions. *Nat. Rev. Microbiol.* **19**, 600–614 (2021).
- 1448 34. M. Kalamara, M. Spacapan, I. Mandic-Mulec, N. R. Stanley-Wall, Social behaviours  
1449 by *Bacillus subtilis*: quorum sensing, kin discrimination and beyond. *Mol. Microbiol.*  
1450 **110**, 863–878 (2018).
- 1451 35. M. Kalamara, J. C. Abbott, C. E. Macphee, N. R. Stanley-Wall, Biofilm  
1452 hydrophobicity in environmental isolates of *Bacillus subtilis*. *Microbiol. (United*  
1453 *Kingdom)* **167** (2021).
- 1454 36. M. Futo, *et al.*, Embryo-Like Features in Developing *Bacillus subtilis* Biofilms. *Mol.*  
1455 *Biol. Evol.* **38**, 31–47 (2021).
- 1456 37. T. Pisithkul, *et al.*, Metabolic remodeling during biofilm development of *bacillus*  
1457 *subtilis*. *MBio* **10** (2019).
- 1458 38. M. Špacapan, *et al.*, The ComX Quorum Sensing Peptide of *Bacillus subtilis* Affects  
1459 Biofilm Formation Negatively and Sporulation Positively. *Microorg. 2020, Vol. 8,*  
1460 *Page 1131* **8**, 1131 (2020).
- 1461 39. M. M. Nakano, L. Xia, P. Zuber, Transcription initiation region of the *srfA* operon,  
1462 which is controlled by the *comP-comA* signal transduction system in *Bacillus subtilis*.  
1463 *J. Bacteriol.* **173**, 5487 (1991).
- 1464 40. N. Comella, A. D. Grossman, Conservation of genes and processes controlled by the  
1465 quorum response in bacteria: Characterization of genes controlled by the quorum-  
1466 sensing transcription factor *ComA* in *Bacillus subtilis*. *Mol. Microbiol.* **57**, 1159–1174  
1467 (2005).
- 1468 41. D. López, R. Kolter, Extracellular signals that define distinct and coexisting cell fates  
1469 in *Bacillus subtilis*. *FEMS Microbiol. Rev.* **34**, 134–149 (2010).

- 1470 42. S. S. Branda, *et al.*, Fruiting body formation by *Bacillus subtilis* Steven. *Proc. Natl.*  
1471 *Acad. Sci.* **98**, 11621–11626 (2001).
- 1472 43. S. S. Branda, *et al.*, Genes Involved in Formation of Structured Multicellular  
1473 Communities by *Bacillus subtilis*. *J. Bacteriol.* **186**, 3970 (2004).
- 1474 44. J. Van Gestel, F. J. Weissing, O. P. Kuipers, Á. T. Kovács, Density of founder cells  
1475 affects spatial pattern formation and cooperation in *Bacillus subtilis* biofilms. *ISME J.*  
1476 **8**, 2069–2079 (2014).
- 1477 45. D. Romero, C. Aguilar, R. Losick, R. Kolter, Amyloid fibers provide structural  
1478 integrity to *Bacillus subtilis* biofilms. *Proc. Natl. Acad. Sci. U. S. A.* **107**, 2230–2234  
1479 (2010).
- 1480 46. E. Erskine, C. E. MacPhee, N. R. Stanley-Wall, Functional Amyloid and Other Protein  
1481 Fibers in the Biofilm Matrix. *J. Mol. Biol.* **430**, 3642 (2018).
- 1482 47. S. S. Branda, F. Chu, D. B. Kearns, R. Losick, R. Kolter, A major protein component  
1483 of the *Bacillus subtilis* biofilm matrix. *Mol. Microbiol.* **59**, 1229–1238 (2006).
- 1484 48. K. I. Yoshida, Y. Fujita, S. D. Ehrlich, Three Asparagine Synthetase Genes of *Bacillus*  
1485 *subtilis*. *J. Bacteriol.* **181**, 6081 (1999).
- 1486 49. S. Azimi, A. D. Klementiev, M. Whiteley, S. P. Diggle, Bacterial Quorum Sensing  
1487 during Infection. *Annu. Rev. Microbiol.* (2020) [https://doi.org/10.1146/annurev-micro-](https://doi.org/10.1146/annurev-micro-032020-093845)  
1488 [032020-093845](https://doi.org/10.1146/annurev-micro-032020-093845).
- 1489 50. S. T. Rutherford, B. L. Bassler, Bacterial quorum sensing: Its role in virulence and  
1490 possibilities for its control. *Cold Spring Harb. Perspect. Med.* **2**, 1–25 (2012).
- 1491 51. M. P. Zwart, *et al.*, Unraveling the causes of adaptive benefits of synonymous  
1492 mutations in TEM-1  $\beta$ -lactamase. *Heredity (Edinb)*. **121**, 406–421 (2018).
- 1493 52. M. Meir, *et al.*, Competition between social cheater viruses is driven by  
1494 mechanistically different cheating strategies. *Sci. Adv.* **6** (2020).
- 1495 53. S. Azimi, *et al.*, Allelic polymorphism shapes community function in evolving  
1496 *Pseudomonas aeruginosa* populations. *ISME J.* (2020) [https://doi.org/10.1038/s41396-](https://doi.org/10.1038/s41396-020-0652-0)  
1497 [020-0652-0](https://doi.org/10.1038/s41396-020-0652-0).
- 1498 54. M. L. M. Salverda, J. A. G. M. de Visser, M. Barlow, Natural evolution of TEM-1  $\beta$ -  
1499 lactamase: Experimental reconstruction and clinical relevance. *FEMS Microbiol. Rev.*  
1500 **34**, 1015–1036 (2010).
- 1501 55. M. Whiteley, S. P. Diggle, E. P. Greenberg, Progress in and promise of bacterial  
1502 quorum sensing research. *Nature* **551**, 313–320 (2017).
- 1503 56. M. Schuster, D. J. Sexton, B. A. Hense, Why quorum sensing controls private goods.  
1504 *Front. Microbiol.* **8**, 1–16 (2017).
- 1505 57. G. A. Cooper, S. A. West, Division of labour and the evolution of extreme  
1506 specialization. *Nat. Ecol. Evol.* **2**, 1161–1167 (2018).
- 1507 58. G. A. Cooper, H. Frost, M. Liu, S. A. West, The consequences of group structure and  
1508 efficiency benefits for the evolution of division of labour. *Elife* **10** (2021).
- 1509 59. S. A. West, G. A. Cooper, Division of labour in microorganisms: an evolutionary  
1510 perspective. *Nat. Rev. Microbiol.* **2016 1411 14**, 716–723 (2016).
- 1511 60. M. Liu, S. A. West, G. A. Cooper, Relatedness and the evolution of mechanisms to  
1512 divide labor in microorganisms. *Ecol. Evol.* **11**, 14475–14489 (2021).
- 1513 61. Y. Chai, F. Chu, R. Kolter, R. Losick, Bistability and biofilm formation in *Bacillus*  
1514 *subtilis*. *Mol. Microbiol.* **67**, 254–263 (2008).
- 1515 62. J. E. González-Pastor, Cannibalism: a social behavior in sporulating *Bacillus subtilis*.  
1516 *FEMS Microbiol. Rev.* **35**, 415–424 (2011).
- 1517 63. V. Molle, *et al.*, The Spo0A regulon of *Bacillus subtilis*. *Mol. Microbiol.* **50**, 1683–  
1518 1701 (2003).
- 1519 64. K. Kobayashi, SlrR/SlrA controls the initiation of biofilm formation in *Bacillus*

- 1520 subtilis. *Mol. Microbiol.* **69**, 1399–1410 (2008).
- 1521 65. M. Miethke, *et al.*, Ferri-bacillibactin uptake and hydrolysis in *Bacillus subtilis*. *Mol.*  
1522 *Microbiol.* **61**, 1413–1427 (2006).
- 1523 66. H. Pi, J. D. Helmann, Sequential induction of Fur-regulated genes in response to iron  
1524 limitation in *Bacillus subtilis*. *Proc. Natl. Acad. Sci. U. S. A.* **114**, 12785–12790  
1525 (2017).
- 1526 67. T. Bucher, *et al.*, An active  $\beta$ -lactamase is a part of an orchestrated cell wall stress  
1527 resistance network of *Bacillus subtilis* and related rhizosphere species. *Environ.*  
1528 *Microbiol.* **21**, 1068–1085 (2019).
- 1529 68. N. Noguchi, M. Sasatsu, M. Kono, “Genetic mapping in *Bacillus subtilis* 168 of the  
1530 *aadK* gene which encodes arminoglycoside 6-adenylyltransferase” (1993).
- 1531 69. C. Torres, C. Galián, C. Freiberg, J. R. Fantino, J. M. Jault, The YheI/YheH  
1532 heterodimer from *Bacillus subtilis* is a multidrug ABC transporter. *Biochim. Biophys.*  
1533 *Acta* **1788**, 615–622 (2009).
- 1534 70. C. R. Harwood, Y. Kikuchi, The ins and outs of *Bacillus* proteases: Activities,  
1535 functions and commercial significance. *FEMS Microbiol. Rev.* **46**, 1–20 (2022).
- 1536 71. B. M. Koo, *et al.*, Construction and Analysis of Two Genome-Scale Deletion Libraries  
1537 for *Bacillus subtilis*. *Cell Syst.* **4**, 291-305.e7 (2017).
- 1538 72. S. Pohl, *et al.*, Proteomic analysis of *Bacillus subtilis* strains engineered for improved  
1539 production of heterologous proteins. *Proteomics* **13**, 3298–3308 (2013).
- 1540 73. D. Romero, *et al.*, The Iturin and Fengycin Families of Lipopeptides Are Key Factors  
1541 in Antagonism of *Bacillus subtilis* Toward *Podospaera fusca*. *MPMI* **20**, 430–440  
1542 (2007).
- 1543 74. S. Müller, *et al.*, Bacillaene and Sporulation Protect *Bacillus subtilis* from Predation by  
1544 *Myxococcus xanthus*. *Appl. Environ. Microbiol.* **80**, 5603 (2014).
- 1545 75. K. Kobayashi, Diverse LXG toxin and antitoxin systems specifically mediate  
1546 intraspecies competition in *Bacillus subtilis* biofilms. *PLOS Genet.* **17**, e1009682  
1547 (2021).
- 1548 76. A. Mariappan, O. Makarewicz, X. H. Chen, R. Borriss, Two-Component Response  
1549 Regulator DegU Controls the Expression of Bacilysin in Plant-Growth-Promoting  
1550 Bacterium *Bacillus amyloliquefaciens* FZB42. *Microb. Physiol.* **22**, 114–125 (2012).
- 1551 77. N. Y. Yu, *et al.*, PSORTb 3.0: Improved protein subcellular localization prediction  
1552 with refined localization subcategories and predictive capabilities for all prokaryotes.  
1553 *Bioinformatics* **26**, 1608–1615 (2010).
- 1554 78. A. Dewar, *et al.*, Plasmids do not consistently stabilize cooperation across bacteria but  
1555 may promote broad pathogen host-range. *Nat. Ecol. Evol.* **5**, 1624–1636 (2021).
- 1556 79. T. Nogueira, *et al.*, Horizontal Gene Transfer of the Secretome Drives the Evolution of  
1557 Bacterial Cooperation and Virulence. *Curr. Biol.* **19**, 1683–1691 (2009).
- 1558 80. J. M. Flowers, *et al.*, Variation, Sex, and Social Cooperation: Molecular Population  
1559 Genetics of the Social Amoeba *Dictyostelium discoideum*. *PLoS Genet.* **6**, e1001013  
1560 (2010).
- 1561 81. O. M. Gilbert, J. E. Strassmann, D. C. Queller, High relatedness in a social amoeba:  
1562 The role of kin-discriminatory segregation. *Proc. R. Soc. B Biol. Sci.* **279**, 2619–2624  
1563 (2012).
- 1564 82. S. Nee, S. A. West, A. F. Read, Inbreeding and parasite sex ratios. *Proc. R. Soc. B*  
1565 *Biol. Sci.* **269**, 755–760 (2002).
- 1566 83. B. Kraigher, M. Butolen, P. Stefanic, I. Mandic Mulec, Kin discrimination drives  
1567 territorial exclusion during *Bacillus subtilis* swarming and restrains exploitation of  
1568 surfactin. *ISME J. 2021 163* **16**, 833–841 (2021).
- 1569 84. M. Martin, *et al.*, Cheaters shape the evolution of phenotypic heterogeneity in *Bacillus*

- 1570 subtilis biofilms. *ISME J. 2020 149* **14**, 2302–2312 (2020).
- 1571 85. N. A. Lyons, B. Kraigher, P. Stefanic, I. Mandic-Mulec, R. Kolter, A Combinatorial  
1572 Kin Discrimination System in *Bacillus subtilis*. *Curr. Biol.*, 1–10 (2016).
- 1573 86. P. Stefanic, B. Kraigher, N. A. Lyons, R. Kolter, I. Mandic-Mulec, Kin discrimination  
1574 between sympatric *Bacillus subtilis* isolates. *Proc. Natl. Acad. Sci. U. S. A.* **112**,  
1575 14042–14047 (2015).
- 1576 87. S. A. West, K. Winzer, A. Gardner, S. P. Diggle, Quorum sensing and the confusion  
1577 about diffusion. *Trends Microbiol.* **20**, 586–594 (2012).
- 1578 88. J. B. Xavier, W. Kim, K. R. Foster, A molecular mechanism that stabilizes cooperative  
1579 secretions in *Pseudomonas aeruginosa*. *Mol. Microbiol.* **79**, 166–179 (2011).
- 1580 89. D. J. Sexton, M. Schuster, Nutrient limitation determines the fitness of cheaters in  
1581 bacterial siderophore cooperation. *Nat. Commun. 2017 81* **8**, 1–8 (2017).
- 1582 90. B. D. Connelly, E. L. Bruger, P. K. McKinley, C. M. Waters, Resource abundance and  
1583 the critical transition to cooperation. *J. Evol. Biol.* **30**, 750–761 (2017).
- 1584 91. N. K. M. Tam, *et al.*, The intestinal life cycle of *Bacillus subtilis* and close relatives. *J.*  
1585 *Bacteriol.* **188**, 2692–2700 (2006).
- 1586 92. L. Fan, *et al.*, Genome sequence of *Bacillus subtilis* subsp. *spizizenii* gtP20b, isolated  
1587 from the Indian ocean. *J. Bacteriol.* **193**, 1276–1277 (2011).
- 1588 93. M. Roberts, F. Cohan, Recombination and Migration Rates in Natural Populations of  
1589 *Bacillus Subtilis* and *Bacillus Mojavensis*. *Evolution (N. Y.)*. **49**, 1081–1094 (1995).
- 1590 94. P. H. Brito, *et al.*, Genetic competence drives genome diversity in *bacillus subtilis*.  
1591 *Genome Biol. Evol.* **10**, 108–124 (2018).
- 1592 95. K. E. Duncan, N. Ferguson, K. Kimura, X. Zhou, C. A. Istock, Fine-Scale Genetic and  
1593 Phenotypic Structure in Natural Populations of *Bacillus subtilis* and *Bacillus*  
1594 *licheniformis*: Implications for Bacterial Evolution and Speciation. *Evolution (N. Y.)*.  
1595 **48**, 2002 (1994).
- 1596 96. K. Kobayashi, Gradual activation of the response regulator DegU controls serial  
1597 expression of genes for flagellum formation and biofilm formation in *Bacillus subtilis*.  
1598 *Mol. Microbiol.* **66**, 395–409 (2007).
- 1599 97. R. M. Berka, *et al.*, Microarray analysis of the *Bacillus subtilis* K-state: genome-wide  
1600 expression changes dependent on ComK. *Mol. Microbiol.* **43**, 1331–1345 (2002).
- 1601 98. M. A. Konkol, K. M. Blair, D. B. Kearns, Plasmid-encoded ComI inhibits competence  
1602 in the ancestral 3610 strain of *Bacillus subtilis*. *J. Bacteriol.* **195**, 4085–4093 (2013).
- 1603 99. S. Arnaouteli, *et al.*, Bifunctionality of a biofilm matrix protein controlled by redox  
1604 state. *Proc. Natl. Acad. Sci. U. S. A.* **114**, E6184–E6191 (2017).
- 1605 100. A. Ostrowski, A. Mehert, A. Prescott, T. B. Kiley, N. R. Stanley-Wall, YuaB functions  
1606 synergistically with the exopolysaccharide and TasA amyloid fibers to allow biofilm  
1607 formation by *Bacillus subtilis*. *J. Bacteriol.* **193**, 4821–4831 (2011).
- 1608 101. R. Kümmerli, *et al.*, Co-evolutionary dynamics between public good producers and  
1609 cheats in the bacterium *Pseudomonas aeruginosa*. *J. Evol. Biol.* **28**, 2264–2274 (2015).
- 1610 102. I. Frost, *et al.*, Cooperation, competition and antibiotic resistance in bacterial colonies.  
1611 *ISME J.* **12**, 1582–1593 (2018).
- 1612 103. K. Poole, Aminoglycoside resistance in *Pseudomonas aeruginosa*. *Antimicrob. Agents*  
1613 *Chemother.* **49**, 479–487 (2005).
- 1614 104. Y. Quentin, G. Fichant, F. Denizot, Inventory, assembly and analysis of *Bacillus*  
1615 *subtilis* ABC transport systems. *J. Mol. Biol.* **287**, 467–484 (1999).
- 1616 105. O. Ertekin, *et al.*, Analysis of a bac operon-silenced strain suggests pleiotropic effects  
1617 of bacilysin in *Bacillus subtilis*. *J. Microbiol.* **58**, 297–313 (2020).
- 1618 106. P. Cingolani, *et al.*, A program for annotating and predicting the effects of single  
1619 nucleotide polymorphisms, SnpEff. *Fly (Austin)*. (2012)

- 1620 <https://doi.org/10.4161/fly.19695>.
- 1621 107. R, R: A language and environment for statistical computing. *R Found. Stat. Comput.*  
1622 *Vienna, Austria.* (2020).
- 1623 108. H. Wickham, *ggplot2 Elegant Graphics for Data Analysis* (2016).
- 1624 109. S. Andrews, FastQC. *Babraham Bioinforma.* (2010).
- 1625 110. H. Li, R. Durbin, Fast and accurate short read alignment with Burrows-Wheeler  
1626 transform. *Bioinformatics* (2009) <https://doi.org/10.1093/bioinformatics/btp324>.
- 1627 111. H. Li, *et al.*, The Sequence Alignment/Map format and SAMtools. *Bioinformatics*  
1628 (2009) <https://doi.org/10.1093/bioinformatics/btp352>.
- 1629 112. Broad Institute, Picard toolkit. *Broad Institute, GitHub Repos.* (2019).
- 1630 113. P. Danecek, *et al.*, Twelve years of SAMtools and BCFtools. *Gigascience* **10**, 1–4  
1631 (2021).
- 1632 114. A. R. Quinlan, I. M. Hall, BEDTools: A flexible suite of utilities for comparing  
1633 genomic features. *Bioinformatics* (2010) <https://doi.org/10.1093/bioinformatics/btq033>.
- 1634 115. B. Pfeifer, U. Wittelsburger, S. E. Ramos-Onsins, M. J. Lercher, PopGenome: An  
1635 efficient swiss army knife for population genomic analyses in R. *Mol. Biol. Evol.* **31**,  
1636 1929–1936 (2014).
- 1637 116. A. McKenna, *et al.*, The genome analysis toolkit: A MapReduce framework for  
1638 analyzing next-generation DNA sequencing data. *Genome Res.* (2010)  
1639 <https://doi.org/10.1101/gr.107524.110>.
- 1640 117. D. Charif, J. R. Lobry, “SeqinR 1.0-2: a contributed package to the R project for  
1641 statistical computing devoted to biological sequences retrieval and analysis.” in  
1642 *Structural Approaches to Sequence Evolution: Molecules, Networks, Populations*, U.  
1643 Bastolla, M. Porto, H. Roman, M. Vendruscolo, Eds. (Springer Verlag, 2007)  
1644 [https://doi.org/10.1007/978-3-540-35306-5\\_10](https://doi.org/10.1007/978-3-540-35306-5_10).
- 1645 118. F. Hildebrand, A. Meyer, A. Eyre-Walker, Evidence of selection upon genomic GC-  
1646 content in bacteria. *PLoS Genet.* **6** (2010).
- 1647 119. P. M. Sharp, E. Bailes, R. J. Grocock, J. F. Peden, R. E. Sockett, Variation in the  
1648 strength of selected codon usage bias among bacteria. *Nucleic Acids Res.* **33**, 1141–  
1649 1153 (2005).
- 1650 120. H. Akashi, T. Gojobori, Metabolic efficiency and amino acid composition in the  
1651 proteomes of Escherichia coli and Bacillus subtilis. *Proc. Natl. Acad. Sci. U. S. A.* **99**,  
1652 3695–3700 (2002).
- 1653 121. R. Raghavan, Y. D. Kelkar, H. Ochman, A selective force favoring increased G+C  
1654 content in bacterial genes. *Proc. Natl. Acad. Sci. U. S. A.* **109**, 14504–14507 (2012).
- 1655 122. E. P. C. Rocha, Codon usage bias from tRNA’s point of view: Redundancy,  
1656 specialization, and efficient decoding for translation optimization. *Genome Res.* **14**,  
1657 2279–2286 (2004).
- 1658 123. Y. Sun, S. G. E. Andersson, SSCU: an R/Bioconductor package for analyzing selective  
1659 profile in synonymous codon usage (2018).
- 1660 124. A. Ross-Gillespie, *et al.*, Frequency Dependence and Cooperation: Theory and a Test  
1661 with Bacteria. *Am. Nat.* **170**, 331–342 (2007).
- 1662 125. J. Gore, H. Youk, A. van Oudenaarden, Snowdrift game dynamics and facultative  
1663 cheating in yeast. *Nature* **459**, 253–256 (2009).
- 1664 126. P. G. Madgwick, L. J. Belcher, J. B. Wolf, Greenbeard Genes : Theory and Reality.  
1665 *Trends Ecol. Evol.*, 1–12 (2019).
- 1666 127. F. Tajima, Statistical method for testing the neutral mutation hypothesis by DNA  
1667 polymorphism. *Genetics* (1989).
- 1668 128. E. Paradis, Pegas: An R package for population genetics with an integrated-modular  
1669 approach. *Bioinformatics* **26**, 419–420 (2010).

- 1670 129. Y. X. Fu, W. H. Li, Statistical tests of neutrality of mutations. *Genetics* (1993)  
1671 <https://doi.org/10.1093/genetics/133.3.693>.
- 1672 130. N. Stoletzki, A. Eyre-Walker, Estimation of the neutrality index. *Mol. Biol. Evol.* **28**,  
1673 63–70 (2011).
- 1674 131. E. P. C. Rocha, Neutral theory, microbial practice: Challenges in bacterial population  
1675 genetics. *Mol. Biol. Evol.* **35**, 1338–1347 (2018).
- 1676 132. A. Oslizlo, *et al.*, Exploring ComQXPA quorum-sensing diversity and biocontrol  
1677 potential of *Bacillus* spp. isolates from tomato rhizosphere (2015)  
1678 <https://doi.org/10.1111/1751-7915.12258> (November 7, 2022).
- 1679 133. H. T. Kiesevalter, *et al.*, Genomic and Chemical Diversity of *Bacillus subtilis*  
1680 Secondary Metabolites against Plant Pathogenic Fungi. *mSystems* **6** (2021).
- 1681 134. K. Steinke, O. S. Mohite, T. Weber, Á. T. Kovács, Phylogenetic Distribution of  
1682 Secondary Metabolites in the *Bacillus subtilis* Species Complex. *mSystems* **6** (2021).
- 1683 135. R. J. Morris, *et al.*, Natural variations in the biofilm-associated protein BslA from the  
1684 genus *Bacillus*. *Sci. Rep.* **7** (2017).  
1685
